# Supplementary material for: PDZD8 interacts with Protrudin and Rab7 at ER-late endosome membrane contact sites associated with mitochondria
Source: PubMed Central journal article supplement (PMC7371716; doi:10.1038/s41467-020-17451-7), 2020-07-20
Supplement: 41467_2020_17451_MOESM1_ESM.pdf [file 41467_2020_17451_MOESM1_ESM.pdf]

**PDZD8 interacts with Protrudin and Rab7 at ER-late endosome  
membrane contact sites that associate with mitochondria**

Elbaz-Alon et al.

Supplementary information includes:

Supplementary Figures 1-7

Supplementary Table 1

Supplementary Table 2

# Supplementary Figure 1

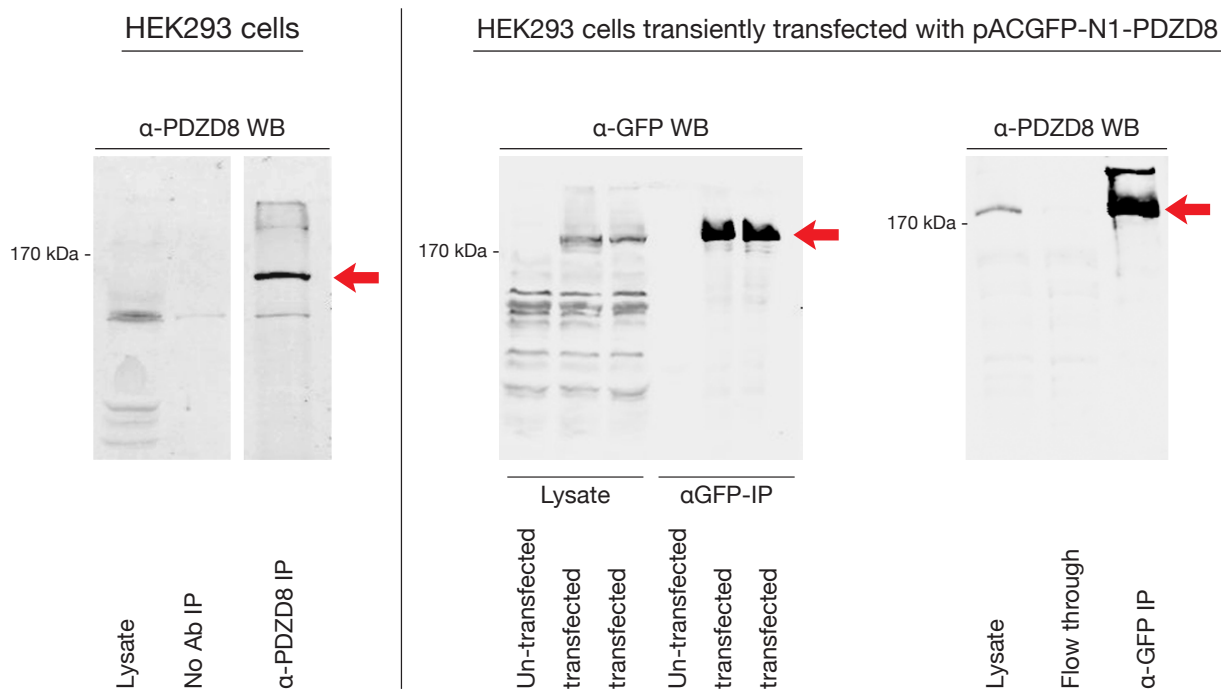

|                                  |     |     |      |
|----------------------------------|-----|-----|------|
| Lysate loaded (μg total protein) | 48  | 40  | 60   |
| IP (mg total protein)            | 0.8 | 0.5 | 0.75 |

**Endogenous PDZD8 and transiently transfected PDZD8-GFP levels.**

Extracts from HEK293T cells (left panel) and HEK293 cells transiently transfected with pACGFP-N1-PDZD8-GFP were immunoprecipitated with an anti-PDZD8 antibody attached to protein G beads (left panel) or anti-GFP-Trap beads (middle and right panels) and Western blot analysis was performed using anti-PDZD8 (left and right panels) or anti-GFP (middle panel) antibodies. Red arrow indicates PDZD8 on blot. Source data are provided as a source data file.

# Supplementary Figure 2

A

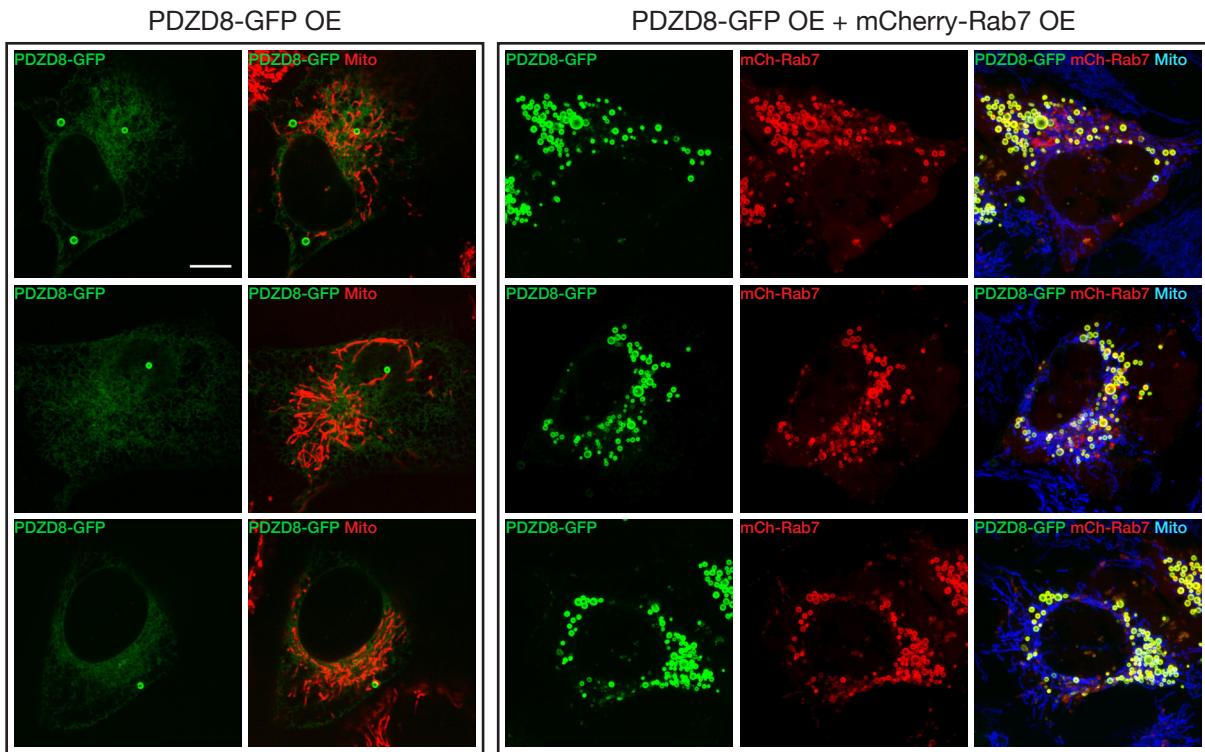

B

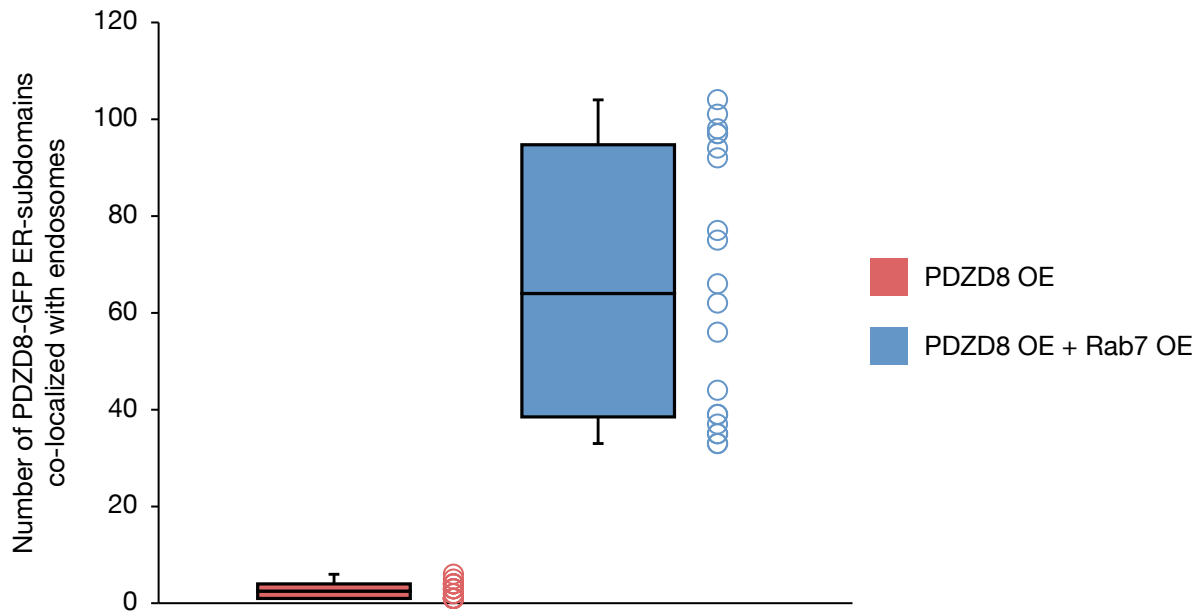

**PDZD8/Rab7 overexpression increases late endosome-associated PDZD8 subdomains.**

(A) Representative images of U2OS cells expressing PDZD8-GFP (green) versus cells co-expressing PDZD8-GFP (in green) and mCherry-Rab7 (in red). The number of PDZD8 mediated ER-LE contacts in each cell was inferred from spherical PDZD8-GFP labeled regions of relative high fluorescence intensity. In cells where PDZD8-GFP and mCherry-Rab7 were overexpressed together areas of co-localization between PDZD8 and Rab7 were counted as ER-late endosome MCSs. Mitochondria (in blue) labeled with MitoTracker DeepRed. Scale bar: 10 $\mu$ m. Images are single planes. (B) Data from n=20 cells is summarized in a box-and-whisker plot. For PDZD8-GFP alone min=1, median=2.5, max=6, bounds of box: Q1=1, Q3 =4. For PDZD8-GFP co-expressed with mCherry-Rab7 min=33, median=64, max=104, bounds of box: Q1=38.5 ,Q3=94.75. The average number of PDZD8-GFP labeled subdomains was 2.5 $\pm$ 1.5 per cell compared to 65.7 $\pm$ 27.4 per cell when co-expressed with mCherry-Rab7 (mean  $\pm$  standard deviation). Source data are provided as a source data file.

### Supplementary Figure 3

Endogenous Rab7

Rab7 over-expression

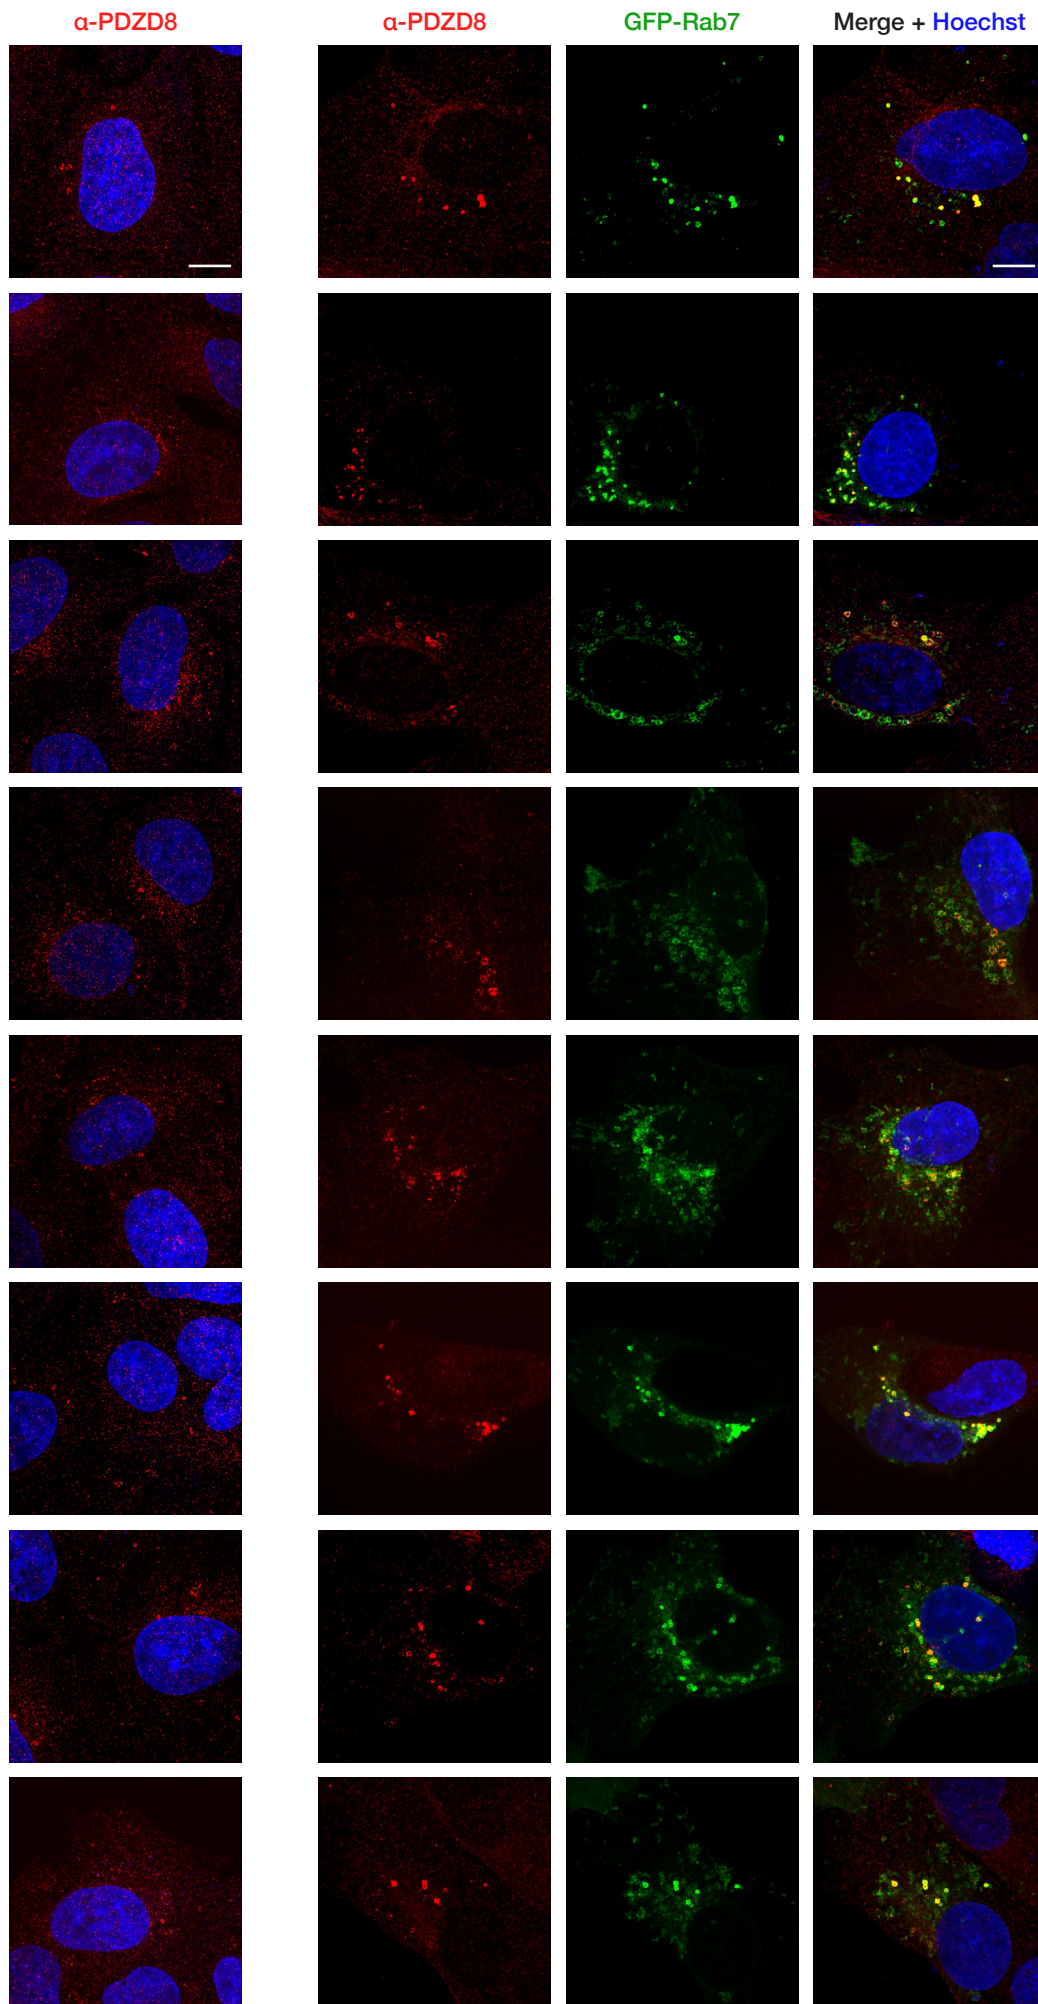

**Endogenously expressed PDZD8 is recruited to Rab7-labeled late endosomes.**

Immunofluorescence analysis of native U2OS cells (left panel) versus U2OS cells expressing GFP-Rab7 (in green; right panel). Cells were fixed, incubated with an anti-PDZD8 (in red) antibody followed by a secondary anti-rabbit AlexaFluor568 antibody and stained with Hoechst stain (labeling the nucleus; in blue). Scale bar: 10 $\mu$ m.

# Supplementary Figure 4

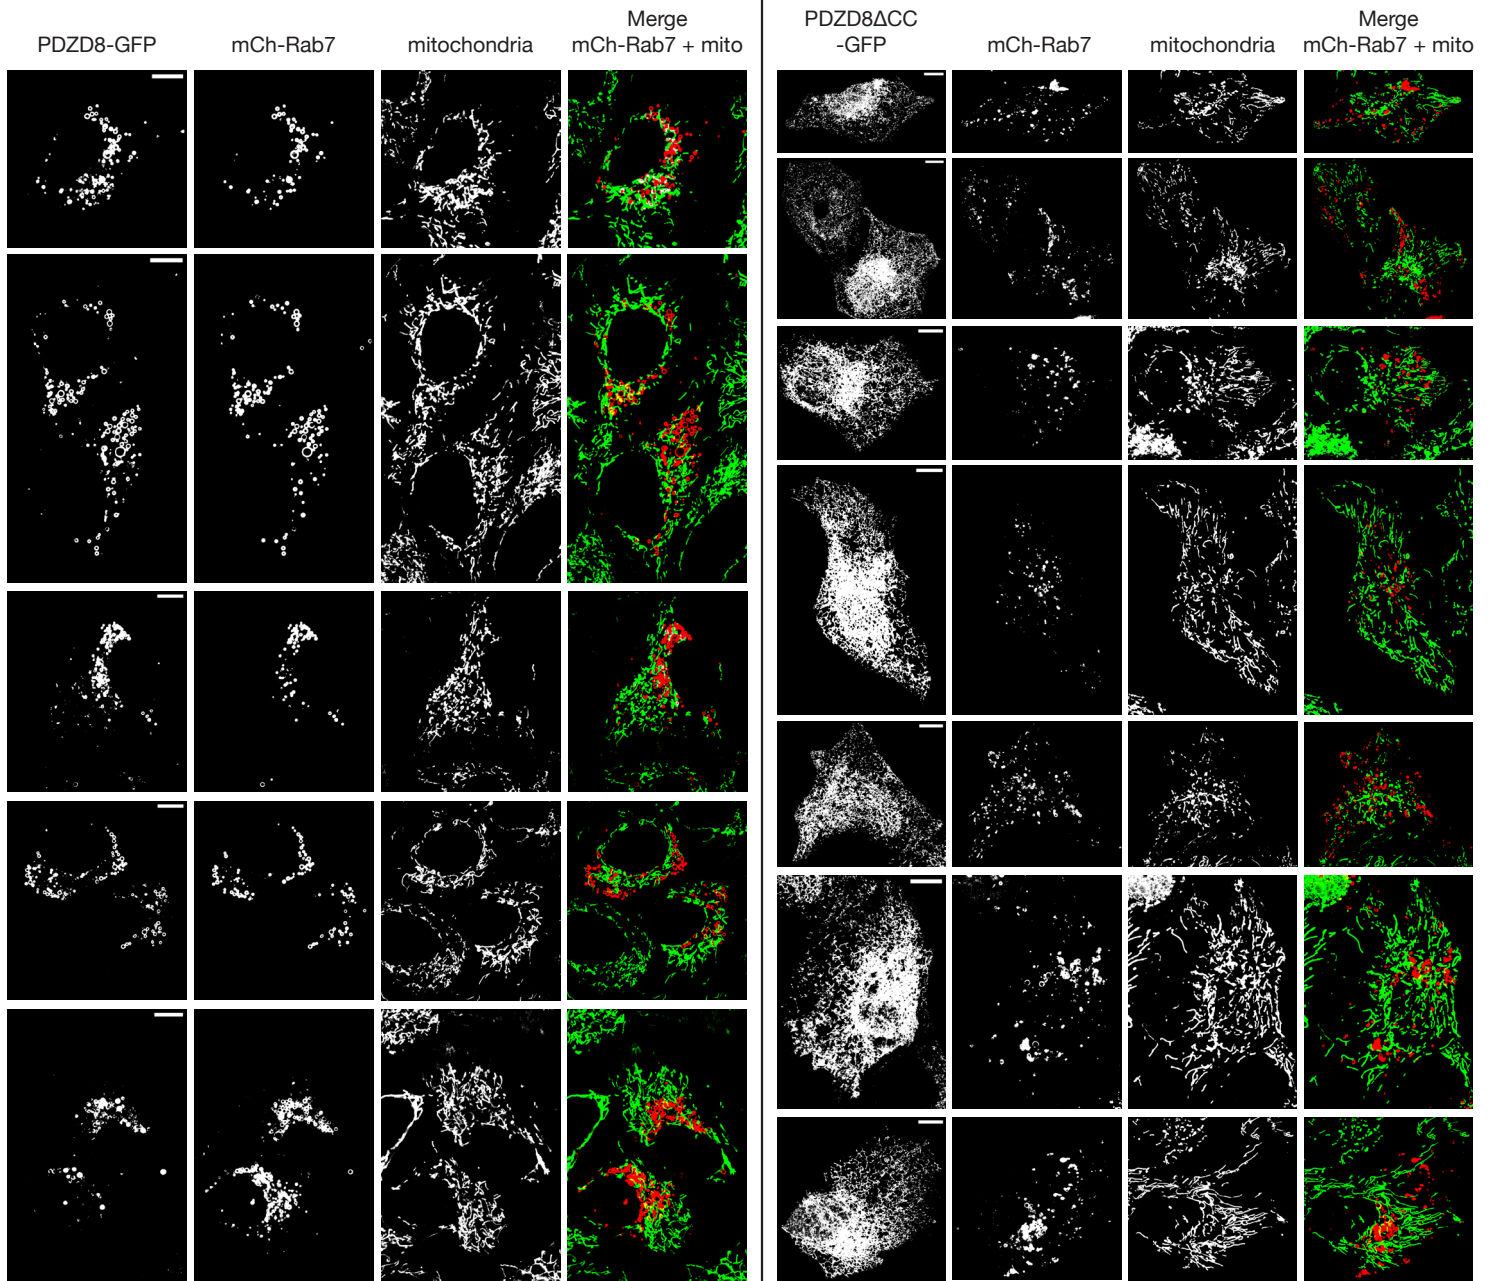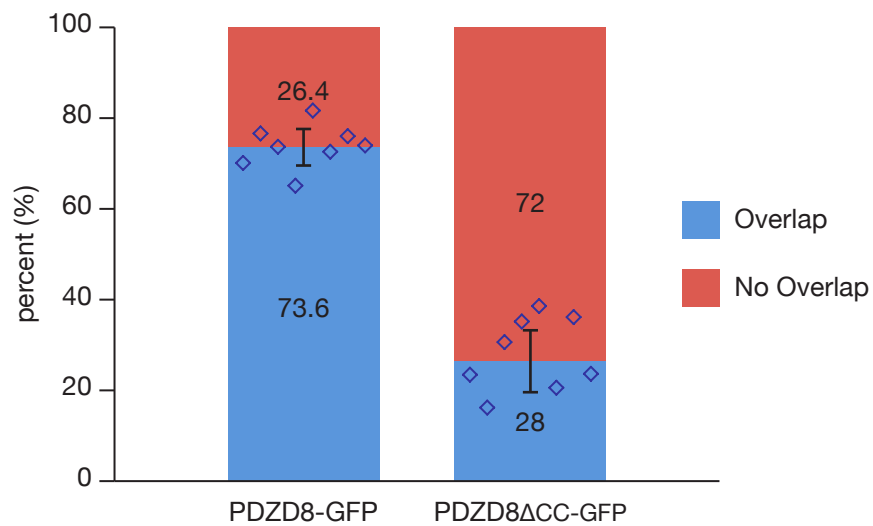



**Overexpression of PDZD8 enhances mitochondrial association with late endosomes in cells.**

Single plane images of U2OS cells overexpressing mCherry-Rab7 and either PDZD8-GFP or PDZD8 $\Delta$ CC-GFP were analyzed by thresholding (ImageJ) and then comparing the number of mCherry-labeled late endosomes whose signal co-localized with MitotrackerDeepRed-labeled mitochondria out of the total number of late endosomes in the cell. The ratio was calculated for each cell and presented as percent (%). Results for n=8 cells for each condition (total of 564 late endosomes counted in cells expressing PDZD8-GFP and mCherry-Rab7, and 706 late endosomes counted in cells expressing PDZD8 $\Delta$ CC-GFP and mCherry-Rab7) are presented in a bar plot as mean  $\pm$  SD. Source .data are provided as a source data file. Scale bar: 10 $\mu$ m

Supplementary Figure 5

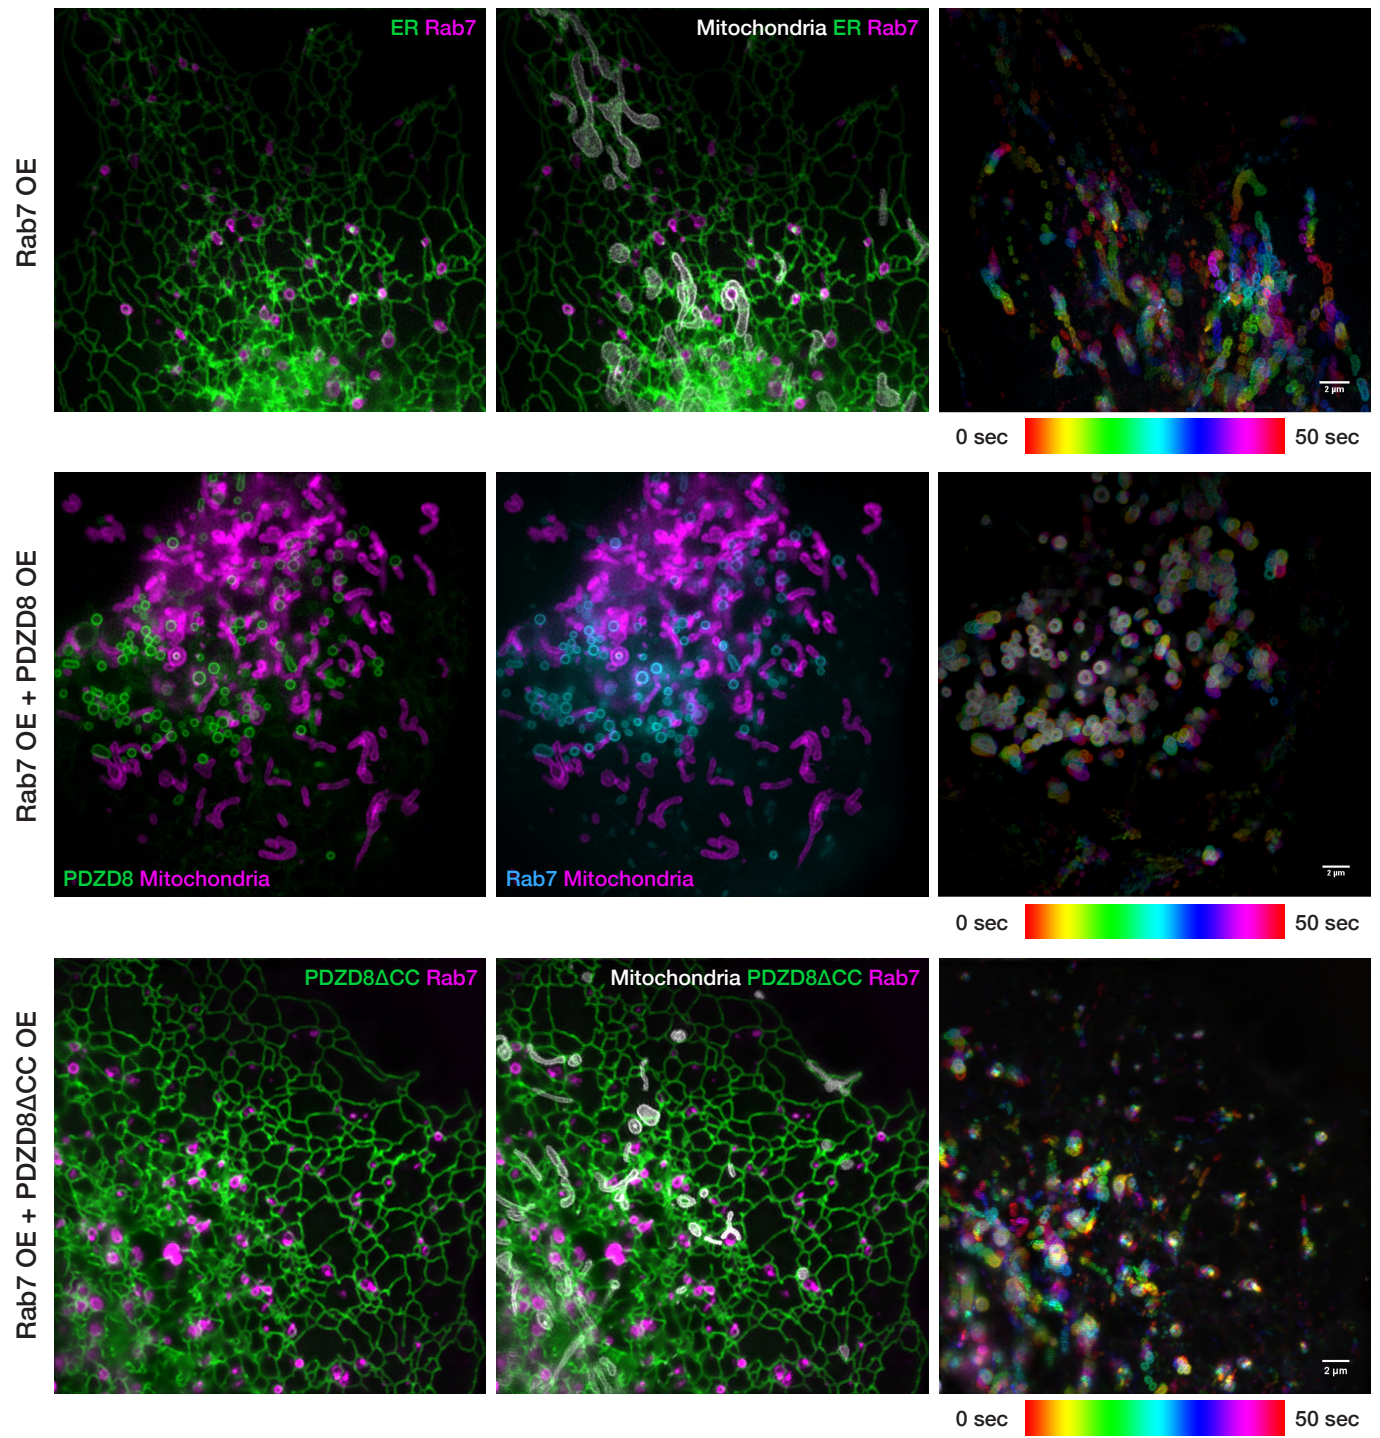

**Mitochondria co-localize with ER-LE contacts marked by PDZD8-GFP and BFP-Rab7.**

Late endosomal motility is impaired in cells overexpressing PDZD8. Representative images from time lapse GI-SIM of COS7 cells expressing BFP-Rab7 with either a general Emerald-Sec61 $\beta$ -ER marker (upper panel; Corresponding supplementary movie file M1), PDZD8-GFP (middle panel; Corresponding supplementary movie file M2) or with PDZD8 $\Delta$ CC-GFP (lower panel, Corresponding supplementary movie file M3), analyzed as temporal color-coded representations. Each GI-SIM image of late endosome is color coded according to its acquisition time point over 50 sec interval, and then a total 50 color-coded images were projected to form a single image, demonstrating the dynamics of Rab7-labeled late endosomes. White = static late endosomes and multiple colors = motile late endosomes. Scale bar: 2 $\mu$ m. Mitochondria labeled with Snap-OMM (mitochondrial outer membrane marker).

# Supplementary Figure 6

## Co-localization analysis

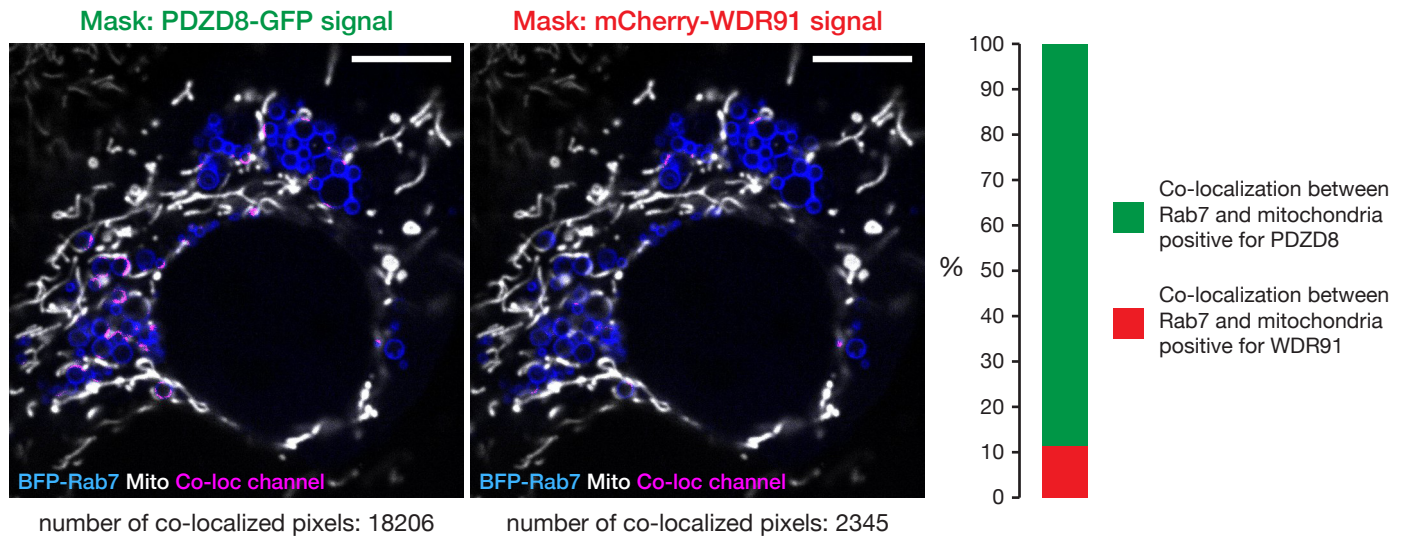

### **Mitochondria co-localize with PDZD8 at Rab7-labeled endosomes.**

Analysis of the amount of contact area (in pixels) between BFP-Rab7-labeled late endosomes (in blue) and mitochondria (in white); a comparison of PDZD8-GFP labeled area versus mCherry-WDR91 labeled area was performed using the software Imaris. A stack of 17 images (z-planes of a single cell) were analyzed using the IMARIS software ImarisCoLoc module. As PDZD8 and WDR91 both interact and co-localize with Rab7 on late endosomes in a mutual exclusive manner, we used the Mask channel feature to define either the PDZD8-GFP or the mCherry-WDR91 as a masking area for the entire analysis. We used that to calculate the relative area of late-endosome (inferred from BFP-Rab7 labeling) contact with MitoTracker-labeled mitochondria that each of these proteins co-localizes with. We then used the Build coloc channel feature in order to save the result of colocalization for each analysis as a separate channel that can be viewed (in purple) as an image for each single plane analyzed. The total contact area (in pixels) through all 17 planes between the BFP-Rab7 signal (late endosomes) and Mitotracker labeled mitochondria was calculated through a PDZD8-GFP masked signal (left image) and then through a mCherry-WDR91 masked based signal (right image) to create a co-localization image for each. The relative area that PDZD8 and WDR91 occupied on the total late-endosome-mitochondria interface is represented in a bar plot. Scale bar: 10 $\mu$ m.

Supplementary Figure 7

Figure 1B

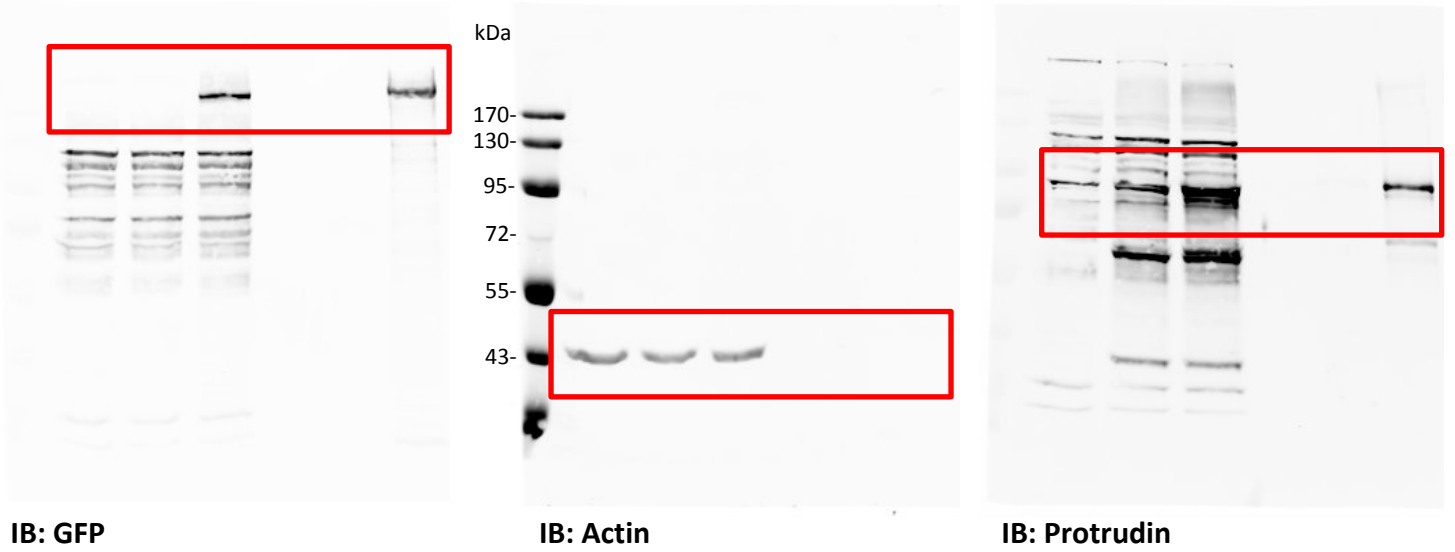

Figure 2F

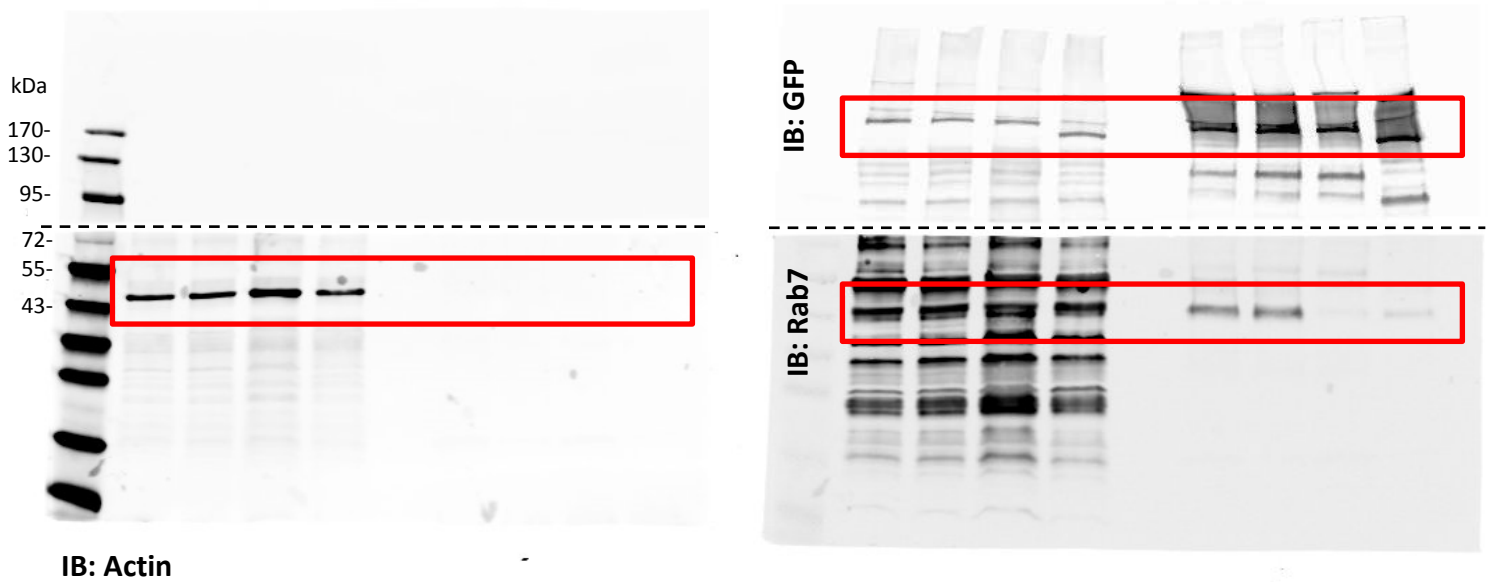

**Figure 4B**

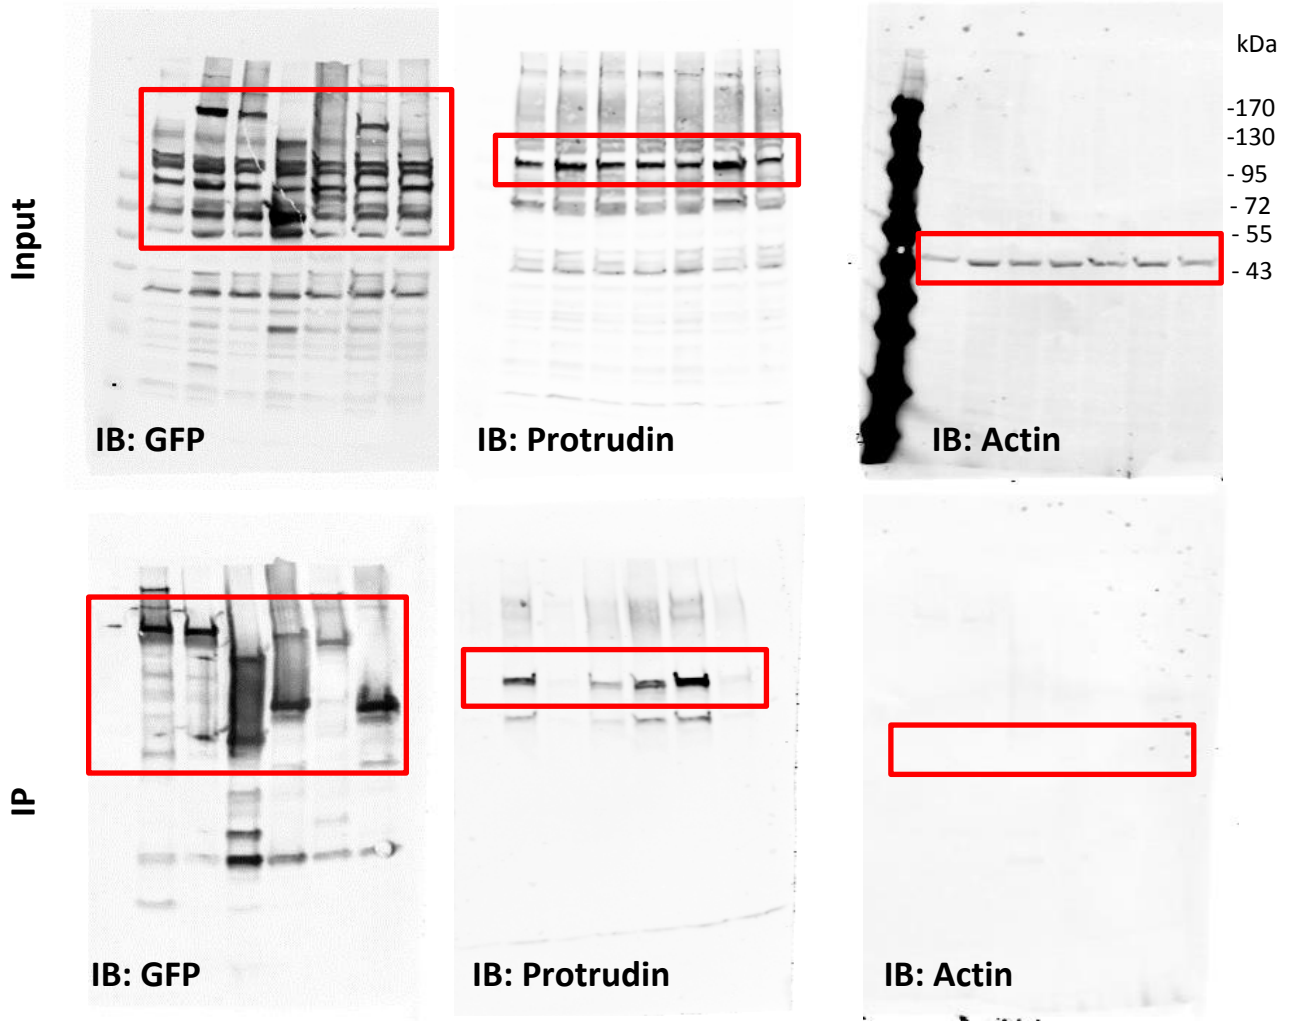

### Supplementary Figure 1

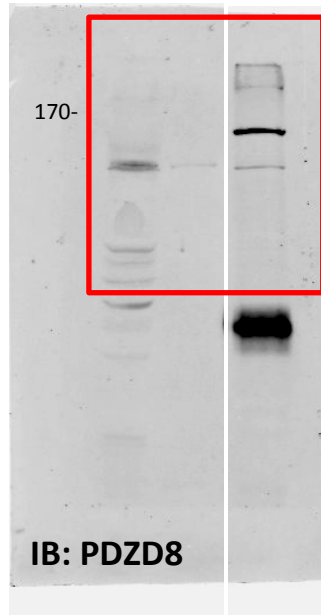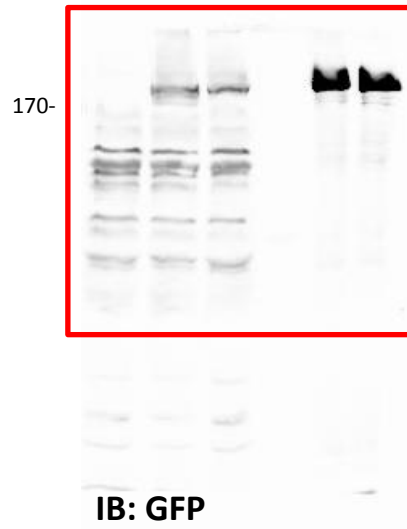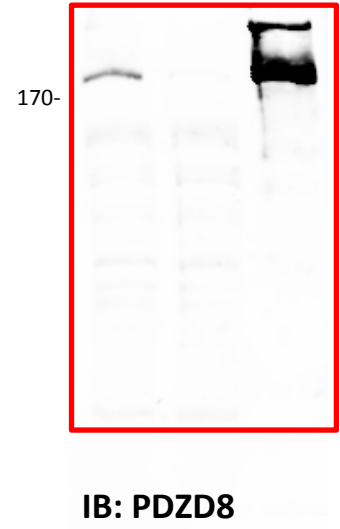

Uncropped images for scanned Western blots contained in Figures 1B, 2F and 4B and Supplementary Figure 1.

.Source data are provided as a Source Data file



**Supplementary table 1: Plasmids used in this study**

| <b>Construct</b>         | <b>Plasmid</b> | <b>Source</b>                            |
|--------------------------|----------------|------------------------------------------|
| PDZD8-GFP (Full length)  | pACGFP-N1      | This study                               |
| PDZD8 (aa27-1154)-GFP    | pACGFP-N1      | This study                               |
| PDZD8 (aa1-1000)-GFP     | pACGFP-N1      | This study                               |
| PDZD8 (aa1-470)-GFP      | pACGFP-N1      | This study                               |
| PDZD8 (aa1-300)-GFP      | pACGFP-N1      | This study                               |
| PDZD8 (aa27-470)-GFP     | pACGFP-N1      | This study                               |
| PDZD8 (aa90-300)-GFP     | pACGFP-N1      | This study                               |
| PDZD8 (aa300-1154)-GFP   | pACGFP-N1      | This study                               |
| PDZD8 (aa800-1154)-GFP   | pACGFP-N1      | This study                               |
| PDZD8 (aa1-1000)-mCherry | pACGFP-N1      | This study                               |
| mCherry-Rab7a            |                | Addgene # 61804                          |
| mCherry-Rab5             |                | Addgene # 49201                          |
| Lamp1-mCherry            | pAC-mCherry-N1 | Kind gift from Katherine Labbe, UC Davis |
| BFP-SEC61beta            |                | Addgene # 49154                          |
| GFP-VAPA                 | pACGFP-C1      | This Study                               |
| mCherry-Rab7a-T22N       | pAC-mCherry-C1 | This Study                               |
| mCherry-Rab7a-Q67L       | pAC-mCherry-C1 | This Study                               |
| BFP-Rab7a                | pAC-EBFP-C1    | This Study                               |
| mCherry-WDR91            | pAC-mCherry-C1 | This Study                               |
| PDZD8-Cherry             | pAC-mCherry-N1 | This Study                               |
| Protrudin-GFP            | pACGFP-N1      | This study                               |

**Supplementary table 2: DNA primers list**

| Plasmid                                                                     | Primer sequence 5'-3'                                                                                          | Remarks                                                                                                           |                                                                                                             |
|-----------------------------------------------------------------------------|----------------------------------------------------------------------------------------------------------------|-------------------------------------------------------------------------------------------------------------------|-------------------------------------------------------------------------------------------------------------|
| pACGFP-N1-PDZD8 /<br>pACmCH-N1-PDZD8                                        | Forward - TTATTATGAATTCATGGGGCTGCTGCTCATGATCCTGGCG<br>Reverse - TATAATTCCTGGGCCACAGACTCGGATGGGCCAAATAAG        | Cloning full length PDZD8 into pAC-N1 plasmids using EcoRI/XmaI restriction sites                                 |                                                                                                             |
| pACGFP-N1-Protrudin /<br>pACmCH-N1-Protrudin /<br>pACGFP-N1-ProtrudinFYVE4A | Forward - TTATTATGAATTCATGCAGACATCAGAACGTGAGGGGAGTGGG<br>Reverse - TATAATTCCTGGGCCCTTGTCAAGGTCTGGTTACACGAGGC   | Cloning full length Protrudin and Protrudin FYVE4A mutant into pAC-N1 plasmids using EcoRI/XmaI restriction sites |                                                                                                             |
| pACGFP-N1-PDZD8 27-1154 /<br>pACmCH-N1-PDZD8 27-1154                        | Forward - TTATTATGAATTCATGTACCGCAGACAGCCCGAGCCGCCGGC<br>Reverse - TATAATTCCTGGGCCACAGACTCGGATGGGCCAAATAAG      |                                                                                                                   |                                                                                                             |
| pACGFP-N1-PDZD8 27-470                                                      | Forward - TTATTATGAATTCATGTACCGCAGACAGCCCGAGCCGCCGGC<br>Reverse - TATAATTCCTGGGGCAAAAAGTTTTCTTCCAAGTGGCCAAAGTT | Cloning truncated versions of PDZD8 into pAC-N1 plasmids using EcoRI/XmaI restriction sites                       |                                                                                                             |
| pACGFP-N1-PDZD8 90-300                                                      | Forward - TTATTATGAATTCATGACGCGGGAGACTTGCTACTTCCTC<br>Reverse - TATAATTCCTGGGCGGTCTGGTATGGAAAAACGGCTTAAAC      |                                                                                                                   |                                                                                                             |
| pACGFP-N1-PDZD8 1-300                                                       | Forward - TTATTATGAATTCATGGGGCTGCTGCTCATGATCCTGGCG<br>Reverse - TATAATTCCTGGGCGGTCTGGTATGGAAAAACGGCTTAAAC      |                                                                                                                   |                                                                                                             |
| pACGFP-N1-PDZD8 1-470                                                       | Forward - TTATTATGAATTCATGGGGCTGCTGCTCATGATCCTGGCG<br>Reverse - TATAATTCCTGGGGCAAAAAGTTTTCTTCCAAGTGGCCAAAGTT   |                                                                                                                   |                                                                                                             |
| pACGFP-N1-PDZD8 1-1000                                                      | Forward - TTATTATGAATTCATGGGGCTGCTGCTCATGATCCTGGCG<br>Reverse - TATAATTCCTGGGCCCTTATTCTGTGCTGTTCC              |                                                                                                                   |                                                                                                             |
| pACGFP-N1-PDZD8 300-1154                                                    | Forward - TTATTATGAATTCATGTTGCAAGGATTTGAAGAAGATGAAG<br>Reverse - TATAATTCCTGGGCCACAGACTCGGATGGGCCAAATAAG       |                                                                                                                   |                                                                                                             |
| pACGFP-N1-PDZD8 800-1154                                                    | Forward - TTATTATGAATTCATGTCAGACCACCATGTAGTTAC<br>Reverse - TATAATTCCTGGGCCACAGACTCGGATGGGCCAAATAAG            |                                                                                                                   |                                                                                                             |
| pACGFP/EBFP/mCH-C1-Rab7                                                     | Forward - ATATATTTAGAATTCTATGACCTCTAGGAAGAAAGTG<br>Reverse - ATATATTAACCCGGGTCTAGCAACTGCAGCTTTCTGCCG           |                                                                                                                   | Cloning of wt RAB7A, RAB7A (T22N) and RAB77A (Q67L) into pAC-C1 plasmids using EcoRI/XmaI restriction sites |
| pACmCH-C1-WDR91                                                             | Forward - TTATTATGAATTCATGGCGGAGGCCGTGGAGCGCAC<br>Reverse - TATAATTCCTGGGCGGCTTATGGGCCAGGAGGGTGGTCAG           |                                                                                                                   | Cloning of WDR91 into pAC-C1 plasmid using EcoRI/XmaI restriction sites                                     |
| pACGFP-C1 VAPA                                                              | Forward - ATATATTTAGAATTCTATGGCGTCCGCCTCAGGGCCATGGCGAAG<br>Reverse - ATATATTAACCCGGGTACAAGATGAATTTCCCTAGAAAG   | Cloning of VAPA into pAC-C1 plasmid using EcoRI/XmaI restriction sites                                            |                                                                                                             |
