# Supplementary material for: PDZD8 interacts with Protrudin and Rab7 at ER-late endosome membrane contact sites associated with mitochondria
Source: PubMed Central journal article supplement (PMC7371716; doi:10.1038/s41467-020-17451-7), 2020-07-20
Supplement: 41467_2020_17451_MOESM2_ESM.pdf [file 41467_2020_17451_MOESM2_ESM.pdf]

**Supplementary Data File 1: Potential interactors of PDZD8.** Mass-spectrometry based results from an analysis of immunoprecipitates using an anti-PDZD8 antibody from crosslinked human HCT116 cell lysates. Significant potential interactors were identified using one-sided Student's t-test (FDR 0.05, S0=0.1)

| Gene names  | Protein names                                                | Student's T-test Significant Control_PDZD8 | -Log Student's T-test p-value Control_PDZD8 | Student's T-test q-value Control_PDZD8 | Student's T-test Difference Control_PDZD8 |
|-------------|--------------------------------------------------------------|--------------------------------------------|---------------------------------------------|----------------------------------------|-------------------------------------------|
| PDZD8       | PDZ domain-containing protein 8                              | +                                          | 4.66815                                     | 0                                      | -11.1716                                  |
| ZFYVE27     | Protrudin                                                    | +                                          | 5.33844                                     | 0                                      | -8.58987                                  |
| RAB7A       | Ras-related protein Rab-7a                                   | +                                          | 2.3438                                      | 0.0440513                              | -1.30709                                  |
| OSBP        | Oxysterol-binding protein 1                                  | +                                          | 2.58845                                     | 0.0293333                              | -3.48095                                  |
| OSBPL8      | Oxysterol-binding protein-related protein 8;Oxysterol-bindin | +                                          | 4.18329                                     | 0.0213333                              | -4.03666                                  |
| OSBPL3      | Oxysterol-binding protein-related protein 3                  | +                                          | 5.11757                                     | 0                                      | -3.95279                                  |
| VAPB        | Vesicle-associated membrane protein-associated protein B/C   | +                                          | 3.19562                                     | 0.03125                                | -3.57987                                  |
| VAPA        | Vesicle-associated membrane protein-associated protein A     | +                                          | 2.92095                                     | 0.0260571                              | -2.34448                                  |
| TRIM21      | E3 ubiquitin-protein ligase TRIM21                           | +                                          | 2.98265                                     | 0.025                                  | -7.56452                                  |
| IGHG1;IGHG3 | Ig gamma-1 chain C region;Ig gamma-3 chain C region          | +                                          | 2.72657                                     | 0.0285                                 | -6.20405                                  |
| PNPLA6      | Neuropathy target esterase                                   | +                                          | 4.3001                                      | 0                                      | -4.92869                                  |
| RINT1       | RAD50-interacting protein 1                                  | +                                          | 2.28078                                     | 0.04                                   | -4.23737                                  |
| PPFIA1      | Liprin-alpha-1                                               | +                                          | 2.8897                                      | 0.0282667                              | -4.11933                                  |
| STX10       | Syntaxin-10                                                  | +                                          | 3.32647                                     | 0.0317143                              | -3.75113                                  |
| RAB3GAP1    | Rab3 GTPase-activating protein catalytic subunit             | +                                          | 4.22676                                     | 0.016                                  | -3.52278                                  |
| DNM1L       | Dynamin-1-like protein                                       | +                                          | 4.01617                                     | 0.0182857                              | -5.34403                                  |
| STIM1       | Stromal interaction molecule 1                               | +                                          | 3.5755                                      | 0.0324                                 | -3.45548                                  |
| FAT1        | Protocadherin Fat 1;Protocadherin Fat 1, nuclear form        | +                                          | 3.50109                                     | 0.031                                  | -3.38028                                  |
| TACC1       | Transforming acidic coiled-coil-containing protein 1         | +                                          | 3.55419                                     | 0.0338182                              | -3.09895                                  |
| NFXL1       | NF-X1-type zinc finger protein NFXL1                         | +                                          | 2.64322                                     | 0.0295814                              | -3.02774                                  |
| ANKLE2      | Ankyrin repeat and LEM domain-containing protein 2           | +                                          | 3.25989                                     | 0.0277778                              | -2.95373                                  |
| NBAS        | Neuroblastoma-amplified sequence                             | +                                          | 2.11587                                     | 0.0440556                              | -2.92929                                  |
| UBXN4       | UBX domain-containing protein 4                              | +                                          | 2.09401                                     | 0.0458133                              | -2.91631                                  |
| CEP170      | Centrosomal protein of 170 kDa                               | +                                          | 3.72808                                     | 0.0257778                              | -2.90229                                  |
| EMC2        | ER membrane protein complex subunit 2                        | +                                          | 4.94348                                     | 0                                      | -2.88812                                  |
| STIM2       | Stromal interaction molecule 2                               | +                                          | 3.02718                                     | 0.0273103                              | -2.88682                                  |

|         |                                                               |   |         |           |          |
|---------|---------------------------------------------------------------|---|---------|-----------|----------|
| WFS1    | Wolframin                                                     | + | 2.71317 | 0.0272    | -2.88342 |
| ESYT1   | Extended synaptotagmin-1                                      | + | 3.04807 | 0.026963  | -2.87975 |
| JAKMIP1 | Janus kinase and microtubule-interacting protein 1            | + | 2.19515 | 0.0427879 | -2.74533 |
| SRPR    | Signal recognition particle receptor subunit alpha            | + | 2.70045 | 0.029561  | -2.69471 |
| TRIM4   | E3 ubiquitin-protein ligase TRIM4                             | + | 2.9473  | 0.0276364 | -2.65648 |
| EIF4E   | Eukaryotic translation initiation factor 4E                   | + | 2.94981 | 0.0268235 | -2.63271 |
| SDF2L1  | Stromal cell-derived factor 2-like protein 1                  | + | 2.2022  | 0.0421493 | -2.63182 |
| CD2AP   | CD2-associated protein                                        | + | 3.23403 | 0.0254545 | -2.54724 |
| DNAJB12 | DnaJ homolog subfamily B member 12                            | + | 2.08081 | 0.0449383 | -2.54073 |
| CALU    | Calumenin                                                     | + | 2.67351 | 0.0280851 | -2.5065  |
| MVD     | Diphosphomevalonate decarboxylase                             | + | 3.35521 | 0.0263158 | -2.45525 |
| HOOK2   | Protein Hook homolog 2                                        | + | 2.72965 | 0.0288571 | -2.44599 |
| CNOT3   | CCR4-NOT transcription complex subunit 3                      | + | 2.25168 | 0.0428571 | -2.40758 |
| KTN1    | Kinectin                                                      | + | 2.88535 | 0.0273333 | -2.38926 |
| MFF     | Mitochondrial fission factor                                  | + | 2.61889 | 0.0265946 | -5.61441 |
| OS9     | Protein OS-9                                                  | + | 3.20596 | 0.0264348 | -2.33754 |
| SCFD1   | Sec1 family domain-containing protein 1                       | + | 2.74428 | 0.0289091 | -2.28463 |
| COPA    | Coatomer subunit alpha;Xenin;Proxenin                         | + | 3.46767 | 0.0333333 | -2.25454 |
| STX18   | Syntaxin-18                                                   | + | 2.49829 | 0.0348148 | -2.23959 |
| CDKAL1  | Threonylcarbamoyladenosine tRNA methylthiotransferase         | + | 3.1628  | 0.0282857 | -2.20484 |
| KIF21A  | Kinesin-like protein KIF21A                                   | + | 2.19592 | 0.043831  | -2.19906 |
| SRP19   | Signal recognition particle 19 kDa protein                    | + | 3.24183 | 0.0253333 | -2.18666 |
| INF2    | Inverted formin-2                                             | + | 2.42881 | 0.0413793 | -2.12068 |
| SREBF1  | Sterol regulatory element-binding protein 1;Processed sterol  | + | 3.1259  | 0.0294194 | -2.0837  |
| PRKAR1A | cAMP-dependent protein kinase type I-alpha regulatory subunit | + | 3.49905 | 0.0294118 | -2.04123 |
| MVP     | Major vault protein                                           | + | 3.83888 | 0.0341538 | -1.97817 |
| PLOD1   | Procollagen-lysine,2-oxoglutarate 5-dioxygenase 1             | + | 2.32848 | 0.0421875 | -1.86901 |
| ATF6    | Cyclic AMP-dependent transcription factor ATF-6 alpha;Proced  | + | 2.37948 | 0.0407097 | -1.85956 |
| PSMD5   | 26S proteasome non-ATPase regulatory subunit 5                | + | 2.67715 | 0.0336    | -1.85692 |
| PTBP3   | Polypyrimidine tract-binding protein 3                        | + | 2.60893 | 0.0336923 | -1.83445 |
| UFL1    | E3 UFM1-protein ligase 1                                      | + | 3.36653 | 0.02672   | -1.79136 |
| ESYT2   | Extended synaptotagmin-2                                      | + | 2.33583 | 0.0415385 | -1.75636 |
| SEC22B  | Vesicle-trafficking protein SEC22b                            | + | 2.50504 | 0.040678  | -1.74633 |

|         |                                                              |   |         |           |           |
|---------|--------------------------------------------------------------|---|---------|-----------|-----------|
| VPS26B  | Vacuolar protein sorting-associated protein 26B              | + | 2.49904 | 0.04      | -1.73288  |
| ITGB4   | Integrin beta-4                                              | + | 2.7883  | 0.0311667 | -1.64648  |
| HLA-C   | HLA class I histocompatibility antigen, Cw-6 alpha chain;HLA | + | 2.17397 | 0.0497073 | -1.62657  |
| PTPN1   | Tyrosine-protein phosphatase non-receptor type 1;Tyrosine-   | + | 2.3789  | 0.0415294 | -1.51244  |
| SRP54   | Signal recognition particle 54 kDa protein                   | + | 2.54855 | 0.0405246 | -1.48667  |
| LIMD1   | LIM domain-containing protein 1                              | + | 2.31273 | 0.0455676 | -1.4699   |
| BRAT1   | BRCA1-associated ATM activator 1                             | + | 2.8588  | 0.0318367 | -1.45555  |
| SPATA5  | Spermatogenesis-associated protein 5                         | + | 2.98225 | 0.0286957 | -1.44132  |
| PRDX4   | Peroxiredoxin-4                                              | + | 3.58494 | 0.028     | -1.40399  |
| ERLIN1  | Erlin-1                                                      | + | 3.20754 | 0.0258947 | -1.39008  |
| BNIP1   | Vesicle transport protein SEC20                              | + | 2.41455 | 0.0417971 | -1.38768  |
| CSK     | Tyrosine-protein kinase CSK                                  | + | 2.79964 | 0.0354717 | -1.30234  |
| EMD     | Emerin                                                       | + | 2.78086 | 0.0375714 | -1.24557  |
| SRP68   | Signal recognition particle subunit SRP68                    | + | 2.36214 | 0.0434937 | -1.24397  |
| SPTLC1  | Serine palmitoyltransferase 1                                | + | 2.39035 | 0.0452105 | -1.23809  |
| CKAP4   | Cytoskeleton-associated protein 4                            | + | 2.41377 | 0.0446234 | -1.18162  |
| SH3GL1  | Endophilin-A2                                                | + | 4.12546 | 0.0238095 | -1.15928  |
| CKAP5   | Cytoskeleton-associated protein 5                            | + | 3.39884 | 0.0278974 | -1.11194  |
| CANX    | Calnexin                                                     | + | 3.1447  | 0.0343529 | -1.02363  |
| NFKB2   | Nuclear factor NF-kappa-B p100 subunit;Nuclear factor NF-k   | + | 2.57915 | 0.0461918 | -0.97946  |
| EPS8L2  | Epidermal growth factor receptor kinase substrate 8-like pro | + | 3.13036 | 0.0382545 | -0.903123 |
| HLA-C   |                                                              | + | 2.88459 | 0.0412    | -0.788956 |
| DYNC1H1 | Cytoplasmic dynein 1 heavy chain 1                           | + | 2.80611 | 0.04355   | -0.757126 |
