# Supplementary material for: PDZD8 interacts with Protrudin and Rab7 at ER-late endosome membrane contact sites associated with mitochondria
Source: PubMed Central journal article supplement (PMC7371716; doi:10.1038/s41467-020-17451-7), 2020-07-20
Supplement: 41467_2020_17451_MOESM3_ESM.pdf [file 41467_2020_17451_MOESM3_ESM.pdf]

**Supplementary Data File 2: Potential interactors of Protrudin.** Mass-spectrometry based results from an analysis of immunoprecipitates using an anti-Protrudin antibody from crosslinked human HCT116 cell lysates. Significant potential interactors were identified using one-sided Student's t-test (FDR 0.05, S0=0.1)

| Gene names  | Protein names                                                          | Student's T-test Significant Control_ZFYVE27 | -Log Student's T-test p-value Control_ZFYVE27 | Student's T-test q-value Control_ZFYVE27 | Student's T-test Difference Control_ZFYVE27 |
|-------------|------------------------------------------------------------------------|----------------------------------------------|-----------------------------------------------|------------------------------------------|---------------------------------------------|
| ZFYVE27     | Protrudin                                                              | +                                            | 5.27168                                       | 0                                        | -10.1867                                    |
| PDZD8       | PDZ domain-containing protein 8                                        | +                                            | 5.80162                                       | 0                                        | -11.5825                                    |
| VAPB        | Vesicle-associated membrane protein-associated protein B/C             | +                                            | 2.9787                                        | 0.00587013                               | -5.43787                                    |
| VAPA        | Vesicle-associated membrane protein-associated protein A               | +                                            | 3.21574                                       | 0.00627778                               | -3.05377                                    |
| MOSPD2      | Motile sperm domain-containing protein 2                               | +                                            | 1.97981                                       | 0.0160989                                | -3.37045                                    |
| RAB7A       | Ras-related protein Rab-7a                                             | +                                            | 3.14381                                       | 0.00607843                               | -2.23241                                    |
| KIF5B       | Kinesin-1 heavy chain                                                  | +                                            | 3.05145                                       | 0.00647619                               | -1.79854                                    |
| OSBP        | Oxysterol-binding protein 1                                            | +                                            | 3.97549                                       | 0                                        | -5.81701                                    |
| OSBPL3      | Oxysterol-binding protein-related protein 3                            | +                                            | 5.95674                                       | 0                                        | -6.37125                                    |
| OSBPL8      | Oxysterol-binding protein-related protein 8;Oxysterol-binding protein  | +                                            | 5.44767                                       | 0                                        | -5.38605                                    |
| RTN4        | Reticulon-4;Reticulon                                                  | +                                            | 1.71603                                       | 0.0245375                                | -3.58816                                    |
| TRIM21      | E3 ubiquitin-protein ligase TRIM21                                     | +                                            | 4.33435                                       | 0                                        | -9.38908                                    |
| IGHG1;IGHG3 | Ig gamma-1 chain C region;Ig gamma-3 chain C region                    | +                                            | 5.19447                                       | 0                                        | -7.78275                                    |
| COPB1       | Coatomer subunit beta                                                  | +                                            | 2.53186                                       | 0.00731507                               | -5.40086                                    |
| PRDX3       | Thioredoxin-dependent peroxide reductase, mitochondrial                | +                                            | 2.43729                                       | 0.00719512                               | -5.33494                                    |
| RAB3GAP1    | Rab3 GTPase-activating protein catalytic subunit                       | +                                            | 2.51756                                       | 0.00716779                               | -5.293                                      |
| DNAJC21     | DnaJ homolog subfamily C member 21                                     | +                                            | 2.04205                                       | 0.012304                                 | -5.2209                                     |
| GIT1        | ARF GTPase-activating protein GIT1                                     | +                                            | 2.95008                                       | 0.00607059                               | -5.02645                                    |
| NBAS        | Neuroblastoma-amplified sequence                                       | +                                            | 4.134                                         | 0                                        | -5.01217                                    |
| TRIM3       | Tripartite motif-containing protein 3                                  | +                                            | 3.33784                                       | 0.0047619                                | -4.87881                                    |
| FNTA        | Protein farnesyltransferase/geranylgeranyltransferase type-1 subunit a | +                                            | 6.26449                                       | 0                                        | -4.80435                                    |
| ZW10        | Centromere/kinetochore protein zw10 homolog                            | +                                            | 1.82743                                       | 0.0181141                                | -4.70503                                    |
| EIF3F       | Eukaryotic translation initiation factor 3 subunit F                   | +                                            | 3.36166                                       | 0.005                                    | -4.69428                                    |
| ACACA       | Acetyl-CoA carboxylase 1;Biotin carboxylase                            | +                                            | 2.86209                                       | 0.00601942                               | -4.65085                                    |
| UBE4A       | Ubiquitin conjugation factor E4 A                                      | +                                            | 3.72452                                       | 0.00176                                  | -4.62364                                    |
| LONP1       | Lon protease homolog, mitochondrial                                    | +                                            | 3.6223                                        | 0.002875                                 | -4.62246                                    |
| RAB2A       | Ras-related protein Rab-2A                                             | +                                            | 3.35766                                       | 0.00465116                               | -4.54571                                    |

|              |                                                                       |   |         |            |          |
|--------------|-----------------------------------------------------------------------|---|---------|------------|----------|
| CCDC186      | Coiled-coil domain-containing protein 186                             | + | 2.96556 | 0.00593103 | -4.51385 |
| PLOD1        | Procollagen-lysine,2-oxoglutarate 5-dioxygenase 1                     | + | 4.39404 | 0          | -4.39132 |
| STX18        | Syntaxin-18                                                           | + | 2.6622  | 0.00651515 | -4.33164 |
| ESYT1        | Extended synaptotagmin-1                                              | + | 4.24577 | 0          | -4.25936 |
| FAT1         | Protocadherin Fat 1;Protocadherin Fat 1, nuclear form                 | + | 3.67216 | 0.00317241 | -4.2436  |
| ARPC1B       | Actin-related protein 2/3 complex subunit 1B                          | + | 2.56308 | 0.00721622 | -4.21334 |
| COPA         | Coatomer subunit alpha;Xenin;Proxenin                                 | + | 5.66442 | 0          | -4.21082 |
| ESRRA        | Steroid hormone receptor ERR1                                         | + | 3.14521 | 0.0061875  | -4.20364 |
| ZBTB2        | Zinc finger and BTB domain-containing protein 2                       | + | 1.86776 | 0.0175802  | -4.12706 |
| LRCH4        | Leucine-rich repeat and calponin homology domain-containing protein   | + | 2.42564 | 0.0080226  | -4.11944 |
| ACBD5        | Acyl-CoA-binding domain-containing protein 5                          | + | 1.92666 | 0.0161905  | -4.07759 |
| REEP6        | Receptor expression-enhancing protein 6;Receptor expression-enhanc    | + | 2.88819 | 0.00596154 | -4.05098 |
| UBXN4        | UBX domain-containing protein 4                                       | + | 3.47159 | 0.00365714 | -3.99664 |
| NAP1L1       | Nucleosome assembly protein 1-like 1                                  | + | 2.75488 | 0.0063     | -3.9415  |
| CTPS2        | CTP synthase 2                                                        | + | 2.77136 | 0.00657391 | -3.91849 |
| ATP5I        | ATP synthase subunit e, mitochondrial                                 | + | 2.52178 | 0.00698137 | -3.9176  |
| STX10        | Syntaxin-10                                                           | + | 3.14926 | 0.00565714 | -3.91311 |
| PROSER2;C10c | Proline and serine-rich protein 2                                     | + | 3.16371 | 0.006      | -3.90323 |
| STIM1        | Stromal interaction molecule 1                                        | + | 3.81644 | 0.00191304 | -3.89908 |
| ITGB4        | Integrin beta-4                                                       | + | 3.42961 | 0.00512821 | -3.88927 |
| EIF3L        | Eukaryotic translation initiation factor 3 subunit L                  | + | 2.73662 | 0.00663415 | -3.88127 |
| ANKLE2       | Ankyrin repeat and LEM domain-containing protein 2                    | + | 2.99552 | 0.00579775 | -3.86211 |
| SRPR         | Signal recognition particle receptor subunit alpha                    | + | 3.35839 | 0.00392157 | -3.83368 |
| VCL          | Vinculin                                                              | + | 3.45238 | 0.00540541 | -3.82928 |
| NFXL1        | NF-X1-type zinc finger protein NFXL1                                  | + | 3.08739 | 0.00602667 | -3.82695 |
| PLOD3        | Procollagen-lysine,2-oxoglutarate 5-dioxygenase 3                     | + | 2.43302 | 0.00833333 | -3.82378 |
| BAG2         | BAG family molecular chaperone regulator 2                            | + | 2.21192 | 0.0115071  | -3.82092 |
| ATF6         | Cyclic AMP-dependent transcription factor ATF-6 alpha;Processed cycli | + | 3.33106 | 0.00513208 | -3.79251 |
| PON1         | Serum paraoxonase/arylesterase 1                                      | + | 3.02695 | 0.00614286 | -3.79011 |
| ARFGAP2      | ADP-ribosylation factor GTPase-activating protein 2                   | + | 2.41307 | 0.00874317 | -3.76255 |
| VPS13C       | Vacuolar protein sorting-associated protein 13C                       | + | 2.01818 | 0.0136952  | -3.73673 |
| ATL2         | Atlastin-2                                                            | + | 1.98369 | 0.0153357  | -3.67285 |
| DDX20        | Probable ATP-dependent RNA helicase DDX20                             | + | 1.54407 | 0.0389191  | -3.6557  |

|           |                                                                      |   |         |            |          |
|-----------|----------------------------------------------------------------------|---|---------|------------|----------|
| KPNA3     | Importin subunit alpha-4                                             | + | 2.04793 | 0.0132424  | -3.65437 |
| DHRS7     | Dehydrogenase/reductase SDR family member 7                          | + | 3.40301 | 0.00416667 | -3.652   |
| TACC1     | Transforming acidic coiled-coil-containing protein 1                 | + | 2.95875 | 0.00632653 | -3.6453  |
| ESYT2     | Extended synaptotagmin-2                                             | + | 3.38429 | 0.004      | -3.62973 |
| RINT1     | RAD50-interacting protein 1                                          | + | 2.86459 | 0.00614545 | -3.60313 |
| SCFD1     | Sec1 family domain-containing protein 1                              | + | 3.19174 | 0.00582353 | -3.59339 |
| RAB3GAP2  | Rab3 GTPase-activating protein non-catalytic subunit                 | + | 2.25452 | 0.0107767  | -3.59242 |
| RBCK1     | RanBP-type and C3HC4-type zinc finger-containing protein 1           | + | 2.72966 | 0.00661538 | -3.57752 |
| MYL3;MYL1 | Myosin light chain 3;Myosin light chain 1/3, skeletal muscle isoform | + | 2.96086 | 0.0062     | -3.57241 |
| PPFIA1    | Liprin-alpha-1                                                       | + | 3.78088 | 0.00328571 | -3.56671 |
| NUP155    | Nuclear pore complex protein Nup155                                  | + | 2.09541 | 0.0123534  | -3.55361 |
| MYOF      | Myoferlin                                                            | + | 2.55922 | 0.00711392 | -3.53953 |
| SEPT8     | Septin-8                                                             | + | 3.55697 | 0.00387879 | -3.53182 |
| MIA3      | Melanoma inhibitory activity protein 3                               | + | 2.19543 | 0.011276   | -3.51044 |
| CTPS1     | CTP synthase 1                                                       | + | 3.75297 | 0.00296774 | -3.48795 |
| BCAP31    | B-cell receptor-associated protein 31                                | + | 2.65237 | 0.00752113 | -3.48737 |
| SDF2L1    | Stromal cell-derived factor 2-like protein 1                         | + | 2.9139  | 0.0064381  | -3.48615 |
| KIF21A    | Kinesin-like protein KIF21A                                          | + | 3.08708 | 0.00661538 | -3.48319 |
| RAB21     | Ras-related protein Rab-21                                           | + | 1.57524 | 0.035645   | -3.47574 |
| ARPC5     | Actin-related protein 2/3 complex subunit 5                          | + | 2.83956 | 0.00603571 | -3.43554 |
| ROCK2     | Rho-associated protein kinase 2                                      | + | 2.18542 | 0.0116637  | -3.43482 |
| MYH10     | Myosin-10                                                            | + | 2.67695 | 0.00686131 | -3.41997 |
| KTN1      | Kinectin                                                             | + | 4.02159 | 0.00209524 | -3.39667 |
| ITPR3     | Inositol 1,4,5-trisphosphate receptor type 3                         | + | 1.80654 | 0.0208229  | -3.37965 |
| CARM1     | Histone-arginine methyltransferase CARM1                             | + | 2.59511 | 0.0072987  | -3.36381 |
| DNM1L     | Dynamin-1-like protein                                               | + | 2.16531 | 0.0122034  | -3.29787 |
| GAPVD1    | GTPase-activating protein and VPS9 domain-containing protein 1       | + | 1.85303 | 0.0192619  | -3.27856 |
| PEX6      | Peroxisome assembly factor 2                                         | + | 2.3621  | 0.00879602 | -3.26331 |
| HSP90AB2P | Putative heat shock protein HSP 90-beta 2                            | + | 1.9744  | 0.0164321  | -3.24052 |
| ACTR1B    | Beta-centractin                                                      | + | 2.37758 | 0.00888442 | -3.2354  |
| AKAP9     | A-kinase anchor protein 9                                            | + | 1.94781 | 0.0164901  | -3.2273  |
| CDK5RAP3  | CDK5 regulatory subunit-associated protein 3                         | + | 1.7818  | 0.0224641  | -3.21992 |
| SLIRP     | SRA stem-loop-interacting RNA-binding protein, mitochondrial         | + | 2.14327 | 0.0123636  | -3.19683 |

|              |                                                                          |   |         |            |          |
|--------------|--------------------------------------------------------------------------|---|---------|------------|----------|
| USE1         | Vesicle transport protein USE1                                           | + | 1.82717 | 0.0207188  | -3.19607 |
| MYL12B;MYL1  | Myosin regulatory light chain 12B;Myosin regulatory light chain 12A      | + | 1.93979 | 0.0161688  | -3.17174 |
| CEP170       | Centrosomal protein of 170 kDa                                           | + | 3.29991 | 0.00453333 | -3.17074 |
| MRPL45       | 39S ribosomal protein L45, mitochondrial                                 | + | 1.74101 | 0.0244444  | -3.16703 |
| PRKAR1A      | cAMP-dependent protein kinase type I-alpha regulatory subunit;cAMP       | + | 3.87364 | 0.00353846 | -3.16131 |
| UFL1         | E3 UFM1-protein ligase 1                                                 | + | 4.3384  | 0          | -3.15291 |
| DNAJB12      | DnaJ homolog subfamily B member 12                                       | + | 2.1057  | 0.0122824  | -3.15192 |
| OGDH         | 2-oxoglutarate dehydrogenase, mitochondrial                              | + | 2.79554 | 0.00658065 | -3.14314 |
| HOOK2        | Protein Hook homolog 2                                                   | + | 3.09146 | 0.006      | -3.13275 |
| CYB5R3       | NADH-cytochrome b5 reductase 3;NADH-cytochrome b5 reductase 3 r          | + | 1.68456 | 0.0282843  | -3.12033 |
| BNIP1        | Vesicle transport protein SEC20                                          | + | 2.75118 | 0.00656489 | -3.11769 |
| STIM2        | Stromal interaction molecule 2                                           | + | 2.50588 | 0.00756571 | -3.10942 |
| TMOD3        | Tropomodulin-3                                                           | + | 1.6639  | 0.0297938  | -3.10074 |
| PNPLA6       | Neuropathy target esterase                                               | + | 3.53437 | 0.00487805 | -3.08996 |
| SRP19        | Signal recognition particle 19 kDa protein                               | + | 4.2036  | 0          | -3.08827 |
| PSMD1        | 26S proteasome non-ATPase regulatory subunit 1                           | + | 2.79363 | 0.0064252  | -3.06782 |
| SAR1A;SAR1B  | GTP-binding protein SAR1a;GTP-binding protein SAR1b                      | + | 2.15319 | 0.0124149  | -3.06678 |
| STK3         | Serine/threonine-protein kinase 3;Serine/threonine-protein kinase 3 3    | + | 1.80639 | 0.0215932  | -3.06584 |
| HBB          | Hemoglobin subunit beta;LVV-hemorphin-7;Spinorphin                       | + | 1.87874 | 0.0180599  | -3.0637  |
| ECM29;KIAA03 | Proteasome-associated protein ECM29 homolog                              | + | 1.48178 | 0.0458856  | -3.05656 |
| NDC1         | Nucleoporin NDC1                                                         | + | 1.5137  | 0.0435051  | -2.99867 |
| EDC4         | Enhancer of mRNA-decapping protein 4                                     | + | 1.79278 | 0.0225263  | -2.9965  |
| SH3GLB2      | Endophilin-B2                                                            | + | 3.90557 | 0.00340741 | -2.98209 |
| OSBPL5       | Oxysterol-binding protein-related protein 5;Oxysterol-binding protein    | + | 2.41038 | 0.00845128 | -2.97838 |
| PSMD7        | 26S proteasome non-ATPase regulatory subunit 7                           | + | 2.37815 | 0.00875248 | -2.96536 |
| FKBP8        | Peptidyl-prolyl cis-trans isomerase FKBP8;Peptidyl-prolyl cis-trans isom | + | 1.47852 | 0.046502   | -2.95593 |
| INF2         | Inverted formin-2                                                        | + | 3.34314 | 0.00468966 | -2.94966 |
| PARP4        | Poly [ADP-ribose] polymerase 4                                           | + | 2.20236 | 0.0121552  | -2.93787 |
| ETF1         | Eukaryotic peptide chain release factor subunit 1                        | + | 1.61757 | 0.03298    | -2.93386 |
| SACM1L       | Phosphatidylinositide phosphatase SAC1                                   | + | 3.28176 | 0.00609231 | -2.93018 |
| AIMP2        | Aminoacyl tRNA synthase complex-interacting multifunctional protein      | + | 2.88612 | 0.00592982 | -2.91924 |
| C1QBP        | Complement component 1 Q subcomponent-binding protein, mitoch            | + | 2.1792  | 0.0123529  | -2.91746 |
| OSBPL9       | Oxysterol-binding protein-related protein 9                              | + | 3.54717 | 0.00454545 | -2.91524 |

|         |                                                                     |   |         |            |          |
|---------|---------------------------------------------------------------------|---|---------|------------|----------|
| VPS35   | Vacuolar protein sorting-associated protein 35                      | + | 1.99529 | 0.0164895  | -2.88271 |
| ACTR1A  | Alpha-centractin                                                    | + | 2.54939 | 0.00740476 | -2.86428 |
| MAGT1   | Magnesium transporter protein 1                                     | + | 2.17226 | 0.0124667  | -2.85183 |
| WDHD1   | WD repeat and HMG-box DNA-binding protein 1                         | + | 2.55956 | 0.00710843 | -2.85065 |
| UTP3    | Something about silencing protein 10                                | + | 1.5005  | 0.0449384  | -2.83608 |
| SEC24C  | Protein transport protein Sec24C                                    | + | 1.67725 | 0.029494   | -2.83064 |
| OS9     | Protein OS-9                                                        | + | 1.85648 | 0.0205782  | -2.82414 |
| SPTLC2  | Serine palmitoyltransferase 2                                       | + | 3.05263 | 0.00626263 | -2.80671 |
| CDKAL1  | Threonylcarbamoyladenosine tRNA methylthiotransferase               | + | 1.89075 | 0.0185194  | -2.76797 |
| ALDH4A1 | Delta-1-pyrroline-5-carboxylate dehydrogenase, mitochondrial        | + | 2.73271 | 0.00733333 | -2.7665  |
| SRP72   | Signal recognition particle subunit SRP72                           | + | 1.93688 | 0.0172956  | -2.75615 |
| TOMM70A | Mitochondrial import receptor subunit TOM70                         | + | 1.53791 | 0.0417988  | -2.72163 |
| COPB2   | Coatomer subunit beta                                               | + | 3.29669 | 0.00557746 | -2.70559 |
| STRAP   | Serine-threonine kinase receptor-associated protein                 | + | 1.94717 | 0.0170978  | -2.69601 |
| HOOK1   | Protein Hook homolog 1                                              | + | 1.81103 | 0.0224222  | -2.68296 |
| SEPT7   | Septin-7                                                            | + | 2.0168  | 0.0160423  | -2.65689 |
| PSMD11  | 26S proteasome non-ATPase regulatory subunit 11                     | + | 2.88234 | 0.00635294 | -2.654   |
| MRPL11  | 39S ribosomal protein L11, mitochondrial                            | + | 1.63383 | 0.0330673  | -2.65291 |
| EIF3D   | Eukaryotic translation initiation factor 3 subunit D                | + | 2.58428 | 0.00715152 | -2.64654 |
| PTRF    | Polymerase I and transcript release factor                          | + | 2.00715 | 0.016375   | -2.63854 |
| CALU    | Calumenin                                                           | + | 1.7722  | 0.024384   | -2.62469 |
| ACBD3   | Golgi resident protein GCP60                                        | + | 1.82471 | 0.021764   | -2.62155 |
| NDUFA13 | NADH dehydrogenase [ubiquinone] 1 alpha subcomplex subunit 13       | + | 1.65388 | 0.0328465  | -2.5973  |
| TMEM131 | Transmembrane protein 131                                           | + | 1.81276 | 0.0223407  | -2.58965 |
| SHMT1   | Serine hydroxymethyltransferase, cytosolic                          | + | 3.20212 | 0.00645    | -2.56978 |
| HSD17B4 | Peroxisomal multifunctional enzyme type 2;(3R)-hydroxyacyl-CoA dehy | + | 2.07092 | 0.0142125  | -2.54888 |
| STRN    | Striatin                                                            | + | 3.14718 | 0.00608696 | -2.52367 |
| ILK     | Integrin-linked protein kinase                                      | + | 2.11121 | 0.0134038  | -2.52178 |
| SRP54   | Signal recognition particle 54 kDa protein                          | + | 3.41153 | 0.00544262 | -2.51485 |
| PSMD13  | 26S proteasome non-ATPase regulatory subunit 13                     | + | 2.90817 | 0.00640678 | -2.50171 |
| COPG2   | Coatomer subunit gamma-2                                            | + | 2.04384 | 0.015516   | -2.49766 |
| TNPO3   | Transportin-3                                                       | + | 3.49797 | 0.00494545 | -2.49541 |
| PHRF1   | PHD and RING finger domain-containing protein 1                     | + | 2.73452 | 0.00736552 | -2.49333 |

|          |                                                                      |   |         |            |          |
|----------|----------------------------------------------------------------------|---|---------|------------|----------|
| PPP6R1   | Serine/threonine-protein phosphatase 6 regulatory subunit 1          | + | 2.00226 | 0.0159732  | -2.49331 |
| AKAP11   | A-kinase anchor protein 11                                           | + | 3.01395 | 0.00620183 | -2.49324 |
| ARHGEF12 | Rho guanine nucleotide exchange factor 12                            | + | 2.02938 | 0.015986   | -2.47842 |
| USP9X    | Probable ubiquitin carboxyl-terminal hydrolase FAF-X                 | + | 2.59862 | 0.0074491  | -2.47797 |
| DNAJC2   | DnaJ homolog subfamily C member 2;DnaJ homolog subfamily C mem       | + | 1.62512 | 0.0343668  | -2.47787 |
| TRIM4    | E3 ubiquitin-protein ligase TRIM4                                    | + | 1.64566 | 0.0328989  | -2.47262 |
| CKAP2    | Cytoskeleton-associated protein 2                                    | + | 1.6571  | 0.0330278  | -2.46726 |
| EIF4E    | Eukaryotic translation initiation factor 4E                          | + | 1.76142 | 0.0249412  | -2.46386 |
| ERCC6L   | DNA excision repair protein ERCC-6-like                              | + | 1.82663 | 0.0225475  | -2.4627  |
| DDRGK1   | DDRGK domain-containing protein 1                                    | + | 3.13601 | 0.00652632 | -2.45756 |
| FAM96B   | Mitotic spindle-associated MMXD complex subunit MIP18                | + | 1.87701 | 0.0205982  | -2.45499 |
| SEC22B   | Vesicle-trafficking protein SEC22b                                   | + | 2.47728 | 0.00853886 | -2.45435 |
| NFAT5    | Nuclear factor of activated T-cells 5                                | + | 1.79357 | 0.0237405  | -2.45124 |
| MLLT4    | Afadin                                                               | + | 5.15196 | 0          | -2.43016 |
| SPTLC1   | Serine palmitoyltransferase 1                                        | + | 3.04295 | 0.00637736 | -2.42133 |
| ERP44    | Endoplasmic reticulum resident protein 44                            | + | 3.38462 | 0.00591045 | -2.41427 |
| EEF1B2   | Elongation factor 1-beta                                             | + | 2.49616 | 0.00871958 | -2.41425 |
| MVP      | Major vault protein                                                  | + | 3.76455 | 0.00376471 | -2.41398 |
| HDAC2    | Histone deacetylase 2                                                | + | 1.73758 | 0.02674    | -2.40822 |
| SPATA5   | Spermatogenesis-associated protein 5                                 | + | 3.40898 | 0.0063871  | -2.40468 |
| SLC4A2   | Anion exchange protein 2;Anion exchange protein                      | + | 1.76124 | 0.0252755  | -2.4006  |
| PSMD5    | 26S proteasome non-ATPase regulatory subunit 5                       | + | 1.64808 | 0.0329933  | -2.39989 |
| TMUB1    | Transmembrane and ubiquitin-like domain-containing protein 1         | + | 2.31626 | 0.0114528  | -2.38487 |
| ATXN2    | Ataxin-2                                                             | + | 1.93773 | 0.0175902  | -2.3835  |
| PAWR     | PRKC apoptosis WT1 regulator protein                                 | + | 1.53371 | 0.0440162  | -2.38022 |
| LMAN1    | Protein ERGIC-53                                                     | + | 3.22711 | 0.00621687 | -2.37968 |
| NOTCH2   | Neurogenic locus notch homolog protein 2;Notch 2 extracellular trunc | + | 1.62264 | 0.0352625  | -2.37909 |
| MRPS31   | 28S ribosomal protein S31, mitochondrial                             | + | 1.75549 | 0.0258734  | -2.3732  |
| DNAJB11  | DnaJ homolog subfamily B member 11                                   | + | 2.80523 | 0.00691176 | -2.37296 |
| ALDH18A1 | Delta-1-pyrroline-5-carboxylate synthase;Glutamate 5-kinase;Gamma-   | + | 2.19704 | 0.0123592  | -2.37044 |
| ARPC2    | Actin-related protein 2/3 complex subunit 2                          | + | 1.79807 | 0.0238167  | -2.36987 |
| ASCC2    | Activating signal cointegrator 1 complex subunit 2                   | + | 2.60181 | 0.00765318 | -2.34529 |
| LRPPRC   | Leucine-rich PPR motif-containing protein, mitochondrial             | + | 2.30656 | 0.0111889  | -2.34151 |

|          |                                                                                                         |   |         |            |          |
|----------|---------------------------------------------------------------------------------------------------------|---|---------|------------|----------|
| DCTN3    | Dynactin subunit 3                                                                                      | + | 1.54232 | 0.0435466  | -2.33358 |
| NFKB2    | Nuclear factor NF-kappa-B p100 subunit;Nuclear factor NF-kappa-B p50                                    | + | 4.45003 | 0          | -2.31832 |
| CKAP4    | Cytoskeleton-associated protein 4                                                                       | + | 2.93822 | 0.00619672 | -2.31277 |
| MT-CO2   | Cytochrome c oxidase subunit 2                                                                          | + | 1.98479 | 0.0165987  | -2.30291 |
| CNOT2    | CCR4-NOT transcription complex subunit 2                                                                | + | 3.64756 | 0.00408163 | -2.29873 |
| JPH1     | Junctophilin-1                                                                                          | + | 2.79618 | 0.00757447 | -2.29837 |
| CSDE1    | Cold shock domain-containing protein E1                                                                 | + | 2.72642 | 0.00744371 | -2.2973  |
| COLGALT1 | Procollagen galactosyltransferase 1                                                                     | + | 4.37432 | 0.002      | -2.28835 |
| OSBPL10  | Oxysterol-binding protein-related protein 10;Oxysterol-binding protein 10                               | + | 3.07213 | 0.00631776 | -2.28519 |
| EXOC8    | Exocyst complex component 8                                                                             | + | 2.587   | 0.00777273 | -2.27594 |
| ACO1     | Cytoplasmic aconitate hydratase                                                                         | + | 2.19809 | 0.0124032  | -2.26729 |
| CAPZA2   | F-actin-capping protein subunit alpha-2                                                                 | + | 2.14835 | 0.0131756  | -2.26565 |
| MAP1S    | Microtubule-associated protein 1S;MAP1S heavy chain;MAP1S light chain                                   | + | 1.79086 | 0.0243799  | -2.26346 |
| ATP13A1  | Manganese-transporting ATPase 13A1                                                                      | + | 2.2919  | 0.0118206  | -2.25894 |
| P4HA1    | Prolyl 4-hydroxylase subunit alpha-1                                                                    | + | 2.19021 | 0.0122063  | -2.25403 |
| TAOK2    | Serine/threonine-protein kinase TAO2                                                                    | + | 2.03344 | 0.0163014  | -2.25058 |
| NOP16    | Nucleolar protein 16                                                                                    | + | 1.81407 | 0.023458   | -2.25032 |
| RELA     | Transcription factor p65                                                                                | + | 2.66253 | 0.00723926 | -2.24263 |
| KCMF1    | E3 ubiquitin-protein ligase KCMF1                                                                       | + | 2.00542 | 0.0161165  | -2.24186 |
| MSI2     | RNA-binding protein Musashi homolog 2                                                                   | + | 2.27308 | 0.0122078  | -2.23962 |
| RAB14    | Ras-related protein Rab-14                                                                              | + | 3.79851 | 0.00355556 | -2.23689 |
| TLN1     | Talin-1                                                                                                 | + | 2.49391 | 0.00869036 | -2.23178 |
| PTPN1    | Tyrosine-protein phosphatase non-receptor type 1;Tyrosine-protein phosphatase 1                         | + | 3.04336 | 0.00609009 | -2.22797 |
| EPS8L2   | Epidermal growth factor receptor kinase substrate 8-like protein 2                                      | + | 1.99739 | 0.0165385  | -2.22768 |
| SCAF1    | Splicing factor, arginine/serine-rich 19                                                                | + | 1.66563 | 0.0327964  | -2.20825 |
| JAKMIP1  | Janus kinase and microtubule-interacting protein 1                                                      | + | 3.74438 | 0.00444444 | -2.20427 |
| ITGB4    | Integrin beta-4                                                                                         | + | 3.4622  | 0.00628571 | -2.18929 |
| PABPC4   | Polyadenylate-binding protein 4;Polyadenylate-binding protein 4                                         | + | 2.82714 | 0.00768345 | -2.16374 |
| UBE2K    | Ubiquitin-conjugating enzyme E2 K                                                                       | + | 1.68942 | 0.0323357  | -2.15374 |
| HECTD1   | E3 ubiquitin-protein ligase HECTD1                                                                      | + | 1.80449 | 0.024382   | -2.15085 |
| WFS1     | Wolframin                                                                                               | + | 2.1879  | 0.0120462  | -2.1401  |
| DNAJC1   | DnaJ homolog subfamily C member 1                                                                       | + | 2.28312 | 0.0120513  | -2.12196 |
| FASN     | Fatty acid synthase;[Acyl-carrier-protein] S-acetyltransferase;[Acyl-carrier-protein] S-acyltransferase | + | 2.78485 | 0.00726531 | -2.11698 |

|             |                                                                     |   |         |            |          |
|-------------|---------------------------------------------------------------------|---|---------|------------|----------|
| LRRCS59     | Leucine-rich repeat-containing protein 59                           | + | 1.70196 | 0.0316432  | -2.10998 |
| RAP1B       | Ras-related protein Rap-1b;Ras-related protein Rap-1b-like protein  | + | 1.58729 | 0.040472   | -2.10217 |
| C19orf25    | UPF0449 protein C19orf25                                            | + | 2.71182 | 0.00693827 | -2.09446 |
| UQCRC1      | Cytochrome b-c1 complex subunit 1, mitochondrial                    | + | 1.52401 | 0.0462441  | -2.09421 |
| DCTN1       | Dynactin subunit 1                                                  | + | 3.19234 | 0.00613861 | -2.09313 |
| EIF3K       | Eukaryotic translation initiation factor 3 subunit K                | + | 3.83622 | 0.00526316 | -2.08955 |
| SEPT11      | Septin-11                                                           | + | 2.76781 | 0.00734641 | -2.08865 |
| ATP6V1A     | V-type proton ATPase catalytic subunit A                            | + | 1.54032 | 0.045014   | -2.08734 |
| KIF16B      | Kinesin-like protein KIF16B                                         | + | 1.81612 | 0.0244492  | -2.08438 |
| FAM195A     | Protein FAM195A                                                     | + | 1.67677 | 0.0329455  | -2.08016 |
| MACF1       | Microtubule-actin cross-linking factor 1, isoforms 1/2/3/5          | + | 1.5898  | 0.04039    | -2.0769  |
| SH3GL1      | Endophilin-A2                                                       | + | 4.19169 | 0.00306667 | -2.06948 |
| ATL3        | Atlastin-3                                                          | + | 1.87304 | 0.0216563  | -2.06639 |
| MKL2;MKL1;M | MKL/myocardin-like protein 2;Phosphatase and actin regulator;MKL/m  | + | 2.6674  | 0.00783432 | -2.05751 |
| VPS4B       | Vacuolar protein sorting-associated protein 4B                      | + | 1.80662 | 0.0244398  | -2.05633 |
| CPD         | Carboxypeptidase D                                                  | + | 2.95848 | 0.006375   | -2.05591 |
| RAB6A       | Ras-related protein Rab-6A                                          | + | 3.29206 | 0.00586364 | -2.04698 |
| ERLIN1      | Erlin-1                                                             | + | 3.23445 | 0.00645833 | -2.04644 |
| RRM1        | Ribonucleoside-diphosphate reductase large subunit                  | + | 2.21119 | 0.0123794  | -2.04463 |
| CKAP5       | Cytoskeleton-associated protein 5                                   | + | 3.63946 | 0.00485714 | -2.04426 |
| FH          | Fumarate hydratase, mitochondrial                                   | + | 2.09375 | 0.015461   | -2.04217 |
| PDCD2L      | Programmed cell death protein 2-like                                | + | 2.04096 | 0.0164356  | -2.04199 |
| SRP68       | Signal recognition particle subunit SRP68                           | + | 3.34756 | 0.00637037 | -2.02861 |
| IARS        | Isoleucine--tRNA ligase, cytoplasmic                                | + | 3.34368 | 0.00629268 | -2.02613 |
| EEF1E1      | Eukaryotic translation elongation factor 1 epsilon-1                | + | 1.68643 | 0.0327963  | -2.0202  |
| TBK1        | Serine/threonine-protein kinase TBK1                                | + | 1.55746 | 0.0439274  | -2.01657 |
| CAPN2       | Calpain-2 catalytic subunit                                         | + | 1.84195 | 0.0234239  | -2.01629 |
| CD2AP       | CD2-associated protein                                              | + | 2.30677 | 0.012103   | -2.00518 |
| RPAP3       | RNA polymerase II-associated protein 3                              | + | 3.5053  | 0.00573913 | -2.00347 |
| ELP3        | Elongator complex protein 3                                         | + | 1.90519 | 0.0209425  | -1.99361 |
| CAMSAP1     | Calmodulin-regulated spectrin-associated protein 1                  | + | 1.79521 | 0.0254721  | -1.97325 |
| GPD1L       | Glycerol-3-phosphate dehydrogenase 1-like protein;Glycerol-3-phosph | + | 2.67254 | 0.0076092  | -1.97093 |
| WASF2       | Wiskott-Aldrich syndrome protein family member 2                    | + | 2.00393 | 0.0174161  | -1.96508 |



|              |                                                                           |   |         |            |          |
|--------------|---------------------------------------------------------------------------|---|---------|------------|----------|
| DDX6         | Probable ATP-dependent RNA helicase DDX6                                  | + | 1.55957 | 0.0440562  | -1.96183 |
| PRKAA1       | 5-AMP-activated protein kinase catalytic subunit alpha-1                  | + | 2.39954 | 0.0109808  | -1.9533  |
| LPCAT2       | Lysophosphatidylcholine acyltransferase 2                                 | + | 2.94969 | 0.00646617 | -1.94958 |
| SEL1L        | Protein sel-1 homolog 1                                                   | + | 2.00767 | 0.0174704  | -1.94943 |
| AP2A1        | AP-2 complex subunit alpha-1                                              | + | 1.61651 | 0.0392135  | -1.94688 |
| PTRH2        | Peptidyl-tRNA hydrolase 2, mitochondrial                                  | + | 1.63438 | 0.0383054  | -1.94624 |
| EPS8         | Epidermal growth factor receptor kinase substrate 8                       | + | 1.6964  | 0.033023   | -1.94075 |
| RBBP4;RBBP7  | Histone-binding protein RBBP4                                             | + | 1.85318 | 0.0234877  | -1.94017 |
| DHX29        | ATP-dependent RNA helicase DHX29                                          | + | 3.76755 | 0.00523077 | -1.93399 |
| RNF214       | RING finger protein 214                                                   | + | 1.97964 | 0.018006   | -1.93142 |
| MYH9         | Myosin-9                                                                  | + | 3.09535 | 0.0059823  | -1.92725 |
| GRIPAP1      | GRIP1-associated protein 1                                                | + | 1.57639 | 0.0435601  | -1.92685 |
| PRDX4        | Peroxiredoxin-4                                                           | + | 2.61745 | 0.00869565 | -1.91824 |
| SARS         | Serine--tRNA ligase, cytoplasmic                                          | + | 1.78344 | 0.026807   | -1.91541 |
| ATP2C1       | Calcium-transporting ATPase type 2C member 1;Calcium-transporting         | + | 1.90092 | 0.0211932  | -1.91348 |
| SEC24B       | Protein transport protein Sec24B                                          | + | 1.6647  | 0.0346957  | -1.91096 |
| SEPT2        | Septin-2                                                                  | + | 2.99383 | 0.00632558 | -1.9096  |
| COP5         | COP9 signalosome complex subunit 5                                        | + | 1.79236 | 0.0262872  | -1.909   |
| EIF3C;EIF3CL | Eukaryotic translation initiation factor 3 subunit C;Eukaryotic translati | + | 3.3459  | 0.00573333 | -1.89825 |
| STX5         | Syntaxin-5                                                                | + | 2.3455  | 0.0117156  | -1.89682 |
| WDR12        | Ribosome biogenesis protein WDR12                                         | + | 2.00609 | 0.0174724  | -1.89207 |
| REEP4        | Receptor expression-enhancing protein 4;Receptor expression-enhanc        | + | 2.60884 | 0.00876596 | -1.87299 |
| DOCK7        | Dedicator of cytokinesis protein 7                                        | + | 2.02034 | 0.017525   | -1.87093 |
| NAA15        | N-alpha-acetyltransferase 15, NatA auxiliary subunit                      | + | 2.26469 | 0.0124534  | -1.86646 |
| C14orf166    | UPF0568 protein C14orf166                                                 | + | 2.13701 | 0.0149527  | -1.86521 |
| USP19        | Ubiquitin carboxyl-terminal hydrolase 19;Ubiquitin carboxyl-terminal h    | + | 1.73289 | 0.031799   | -1.86133 |
| GRWD1        | Glutamate-rich WD repeat-containing protein 1                             | + | 2.5873  | 0.00858333 | -1.85553 |
| ARCN1        | Coatomer subunit delta                                                    | + | 3.8959  | 0.00425532 | -1.85169 |
| SREBF1       | Sterol regulatory element-binding protein 1;Processed sterol regulator    | + | 3.66661 | 0.00461017 | -1.84856 |
| LCLAT1       | Lysocardiolipin acyltransferase 1                                         | + | 1.53726 | 0.0464297  | -1.84846 |
| DYNC1H1      | Cytoplasmic dynein 1 heavy chain 1                                        | + | 3.91691 | 0.00434783 | -1.84686 |
| CLPX         | ATP-dependent Clp protease ATP-binding subunit clpX-like, mitochond       | + | 2.0854  | 0.0162457  | -1.84639 |
| RCN1         | Reticulocalbin-1                                                          | + | 2.23413 | 0.0122759  | -1.82601 |

|               |                                                                     |   |         |            |          |
|---------------|---------------------------------------------------------------------|---|---------|------------|----------|
| EIF3G         | Eukaryotic translation initiation factor 3 subunit G                | + | 2.56297 | 0.00884    | -1.81912 |
| ATP5L         | ATP synthase subunit g, mitochondrial                               | + | 1.99752 | 0.0178667  | -1.81687 |
| MRPL49        | 39S ribosomal protein L49, mitochondrial                            | + | 1.9973  | 0.0179518  | -1.79995 |
| ARHGEF10      | Rho guanine nucleotide exchange factor 10                           | + | 3.74117 | 0          | -11.3392 |
| COL4A3BP      | Collagen type IV alpha-3-binding protein                            | + | 3.95508 | 0          | -6.93357 |
| PITPNM1       | Membrane-associated phosphatidylinositol transfer protein 1         | + | 5.12964 | 0          | -5.74462 |
| BIRC6         | Baculoviral IAP repeat-containing protein 6                         | + | 4.00096 | 0          | -5.39135 |
| PPP6R2        | Serine/threonine-protein phosphatase 6 regulatory subunit 2         | + | 1.70022 | 0.0329196  | -1.79796 |
| BRAT1         | BRCA1-associated ATM activator 1                                    | + | 2.41098 | 0.0113458  | -1.79038 |
| GIT2          | ARF GTPase-activating protein GIT2                                  | + | 2.16271 | 0.0146715  | -1.78812 |
| GCN1L1        | Translational activator GCN1                                        | + | 3.00483 | 0.00641791 | -1.77745 |
| MOGS          | Mannosyl-oligosaccharide glucosidase                                | + | 2.85686 | 0.00739474 | -1.77176 |
| MEMO1         | Protein MEMO1                                                       | + | 2.86189 | 0.00749333 | -1.76283 |
| TMED9         | Transmembrane emp24 domain-containing protein 9                     | + | 1.52249 | 0.0498301  | -1.74258 |
| MTA2          | Metastasis-associated protein MTA2                                  | + | 1.62407 | 0.0400832  | -1.7414  |
| EIF4G1        | Eukaryotic translation initiation factor 4 gamma 1                  | + | 2.60543 | 0.00873469 | -1.73948 |
| CANX          | Calnexin                                                            | + | 3.81529 | 0.00503704 | -1.73887 |
| CAPZA1        | F-actin-capping protein subunit alpha-1                             | + | 2.20284 | 0.013603   | -1.73877 |
| TACC2         | Transforming acidic coiled-coil-containing protein 2                | + | 1.93827 | 0.0208825  | -1.73819 |
| RUFY1         | RUN and FYVE domain-containing protein 1                            | + | 2.82642 | 0.00706918 | -1.73525 |
| MFN2          | Mitofusin-2                                                         | + | 3.08169 | 0.006528   | -1.72943 |
| CYFIP1;CYFIP2 | Cytoplasmic FMR1-interacting protein 1;Cytoplasmic FMR1-interacting | + | 3.6007  | 0.00619178 | -1.71812 |
| UBQLN1        | Ubiquilin-1                                                         | + | 2.19385 | 0.0140221  | -1.70714 |
| FNDC3A        | Fibronectin type-III domain-containing protein 3A                   | + | 2.3485  | 0.0124051  | -1.70603 |
| VCP           | Transitional endoplasmic reticulum ATPase                           | + | 4.62894 | 0.00183333 | -1.70493 |
| KIAA1107      | Uncharacterized protein KIAA1107                                    | + | 1.84013 | 0.0250051  | -1.70351 |
| MTA1          | Metastasis-associated protein MTA1                                  | + | 2.04615 | 0.0173622  | -1.69628 |
| ATP5B         | ATP synthase subunit beta, mitochondrial;ATP synthase subunit beta  | + | 1.93869 | 0.0212536  | -1.69184 |
| AGL           | Glycogen debranching enzyme;4-alpha-glucanotransferase;Amylo-alpha  | + | 1.64115 | 0.0394515  | -1.68924 |
| MRPL2         | 39S ribosomal protein L2, mitochondrial                             | + | 2.06901 | 0.0166603  | -1.68333 |
| COPG1         | Coatomer subunit gamma-1                                            | + | 3.13916 | 0.00624793 | -1.67667 |
| GSPT1         | Eukaryotic peptide chain release factor GTP-binding subunit ERF3A   | + | 2.44038 | 0.011293   | -1.67486 |
| EEF1G         | Elongation factor 1-gamma                                           | + | 2.94864 | 0.00746853 | -1.67324 |

|              |                                                                          |   |         |            |          |
|--------------|--------------------------------------------------------------------------|---|---------|------------|----------|
| ERP29        | Endoplasmic reticulum resident protein 29                                | + | 1.91158 | 0.0224022  | -1.67301 |
| PKN2         | Serine/threonine-protein kinase N2                                       | + | 1.79546 | 0.0284293  | -1.67097 |
| PRRC2A       | Protein PRRC2A                                                           | + | 1.57313 | 0.0456126  | -1.65776 |
| PALLD        | Palladin                                                                 | + | 1.68733 | 0.035568   | -1.65565 |
| PPP1CA       | Serine/threonine-protein phosphatase PP1-alpha catalytic subunit;Seri    | + | 1.53641 | 0.0490213  | -1.65195 |
| MMGT1        | Membrane magnesium transporter 1                                         | + | 1.56181 | 0.046411   | -1.6411  |
| KLC2         | Kinesin light chain 2                                                    | + | 1.73138 | 0.0327215  | -1.6377  |
| TRIOBP       | TRIO and F-actin-binding protein                                         | + | 2.41093 | 0.0117679  | -1.63452 |
| AGAP3        | Arf-GAP with GTPase, ANK repeat and PH domain-containing protein 3       | + | 1.64273 | 0.0400502  | -1.62796 |
| UBR4         | E3 ubiquitin-protein ligase UBR4                                         | + | 2.7258  | 0.00828729 | -1.62172 |
| DCTN2        | Dynactin subunit 2                                                       | + | 2.89442 | 0.00715924 | -1.61792 |
| RARS         | Arginine--tRNA ligase, cytoplasmic                                       | + | 2.86376 | 0.007025   | -1.61579 |
| TNKS1BP1     | 182 kDa tankyrase-1-binding protein                                      | + | 1.61399 | 0.0434367  | -1.60881 |
| SNX1         | Sorting nexin-1                                                          | + | 2.26371 | 0.0131255  | -1.60025 |
| TBC1D15      | TBC1 domain family member 15                                             | + | 1.90808 | 0.0232131  | -1.60024 |
| ENAH         | Protein enabled homolog                                                  | + | 2.45358 | 0.0112407  | -1.59874 |
| CDH3         | Cadherin-3                                                               | + | 2.70711 | 0.00860215 | -1.59702 |
| KIF3B        | Kinesin-like protein KIF3B;Kinesin-like protein KIF3B, N-terminally proc | + | 2.31158 | 0.012255   | -1.59684 |
| PXN          | Paxillin                                                                 | + | 2.04659 | 0.0177317  | -1.59298 |
| ABI1         | Abl interactor 1                                                         | + | 2.09422 | 0.0166518  | -1.58588 |
| ACTN1        | Alpha-actinin-1                                                          | + | 1.98446 | 0.020538   | -1.5846  |
| RCN2         | Reticulocalbin-2                                                         | + | 1.87044 | 0.0243523  | -1.57215 |
| AHNAK        | Neuroblast differentiation-associated protein AHNAK                      | + | 2.22397 | 0.0139706  | -1.56742 |
| HIP1R        | Huntingtin-interacting protein 1-related protein                         | + | 1.80601 | 0.0287767  | -1.56674 |
| GEMIN5       | Gem-associated protein 5                                                 | + | 2.42391 | 0.0117719  | -1.56598 |
| SEH1L        | Nucleoporin SEH1                                                         | + | 1.87517 | 0.0242494  | -1.55151 |
| PABPC1;PABPC | Polyadenylate-binding protein 1;Polyadenylate-binding protein;Polyad     | + | 2.19728 | 0.0152806  | -1.55026 |
| BAG6;BAT3    | Large proline-rich protein BAG6                                          | + | 3.34188 | 0.00625926 | -1.54311 |
| DNAAF5       | Dynein assembly factor 5, axonemal                                       | + | 2.40755 | 0.0122553  | -1.54218 |
| TAP2         | Antigen peptide transporter 2                                            | + | 2.1546  | 0.0164138  | -1.53984 |
| DYNC1LI1     | Cytoplasmic dynein 1 light intermediate chain 1                          | + | 2.19302 | 0.0155714  | -1.53429 |
| ANKRD40      | Ankyrin repeat domain-containing protein 40                              | + | 1.55819 | 0.0479845  | -1.53424 |
| CALR         | Calreticulin                                                             | + | 2.12141 | 0.016271   | -1.53171 |

|             |                                                                        |   |         |            |          |
|-------------|------------------------------------------------------------------------|---|---------|------------|----------|
| FLNB        | Filamin-B                                                              | + | 2.79038 | 0.00797753 | -1.51755 |
| TRIM47      | Tripartite motif-containing protein 47                                 | + | 3.23122 | 0.00646154 | -1.51687 |
| VAT1        | Synaptic vesicle membrane protein VAT-1 homolog                        | + | 3.7184  | 0.00610811 | -1.51321 |
| PRKCSH      | Glucosidase 2 subunit beta                                             | + | 2.13757 | 0.0163816  | -1.51294 |
| ABI2        | Abl interactor 2                                                       | + | 1.81137 | 0.0288696  | -1.50696 |
| ARPC4;ARPC4 | Actin-related protein 2/3 complex subunit 4                            | + | 1.8964  | 0.0244468  | -1.50492 |
| UBE2O       | E2/E3 hybrid ubiquitin-protein ligase UBE2O                            | + | 1.83609 | 0.0269181  | -1.4954  |
| DYNC1L12    | Cytoplasmic dynein 1 light intermediate chain 2                        | + | 1.73472 | 0.0332804  | -1.49476 |
| IDH3G       | Isocitrate dehydrogenase [NAD] subunit gamma, mitochondrial;Isocitrate | + | 1.8302  | 0.0277543  | -1.49084 |
| KLC1        | Kinesin light chain 1                                                  | + | 2.17494 | 0.0163183  | -1.48359 |
| SP3         | Transcription factor Sp3                                               | + | 2.16862 | 0.0163574  | -1.48184 |
| HK2         | Hexokinase-2;Hexokinase                                                | + | 1.72508 | 0.0345621  | -1.48125 |
| AAAS        | Aladin                                                                 | + | 2.36323 | 0.0125041  | -1.47871 |
| DARS        | Aspartate--tRNA ligase, cytoplasmic                                    | + | 3.26118 | 0.00651724 | -1.47313 |
| ZC3H15      | Zinc finger CCCH domain-containing protein 15                          | + | 2.38379 | 0.0124609  | -1.46328 |
| PDP1        | [Pyruvate dehydrogenase [acetyl-transferring]]-phosphatase 1, mitoch   | + | 2.16164 | 0.0163987  | -1.45159 |
| IGF2R       | Cation-independent mannose-6-phosphate receptor                        | + | 1.76663 | 0.0330993  | -1.44952 |
| CCDC47      | Coiled-coil domain-containing protein 47                               | + | 2.45325 | 0.0116696  | -1.44491 |
| ASPH        | Aspartyl/asparaginyl beta-hydroxylase                                  | + | 2.54284 | 0.0109282  | -1.44395 |
| USP10       | Ubiquitin carboxyl-terminal hydrolase 10                               | + | 2.03713 | 0.020213   | -1.44237 |
| MAPRE1      | Microtubule-associated protein RP/EB family member 1                   | + | 2.50553 | 0.0111376  | -1.44181 |
| HSP90B1     | Endoplasmic                                                            | + | 2.98454 | 0.00720513 | -1.43724 |
| EIF3I       | Eukaryotic translation initiation factor 3 subunit I                   | + | 2.38815 | 0.0124098  | -1.4358  |
| PRKAR2A     | cAMP-dependent protein kinase type II-alpha regulatory subunit         | + | 3.54853 | 0.00639175 | -1.43411 |
| ACTR3       | Actin-related protein 3                                                | + | 2.34588 | 0.0121395  | -1.42976 |
| UNC45A      | Protein unc-45 homolog A                                               | + | 1.79503 | 0.0315671  | -1.4278  |
| ANKHD1      | Ankyrin repeat and KH domain-containing protein 1                      | + | 1.66666 | 0.0406021  | -1.41253 |
| PKMYT1      | Membrane-associated tyrosine- and threonine-specific cdc2-inhibitory   | + | 1.927   | 0.0242151  | -1.4125  |
| NARS        | Asparagine--tRNA ligase, cytoplasmic                                   | + | 1.74607 | 0.0339207  | -1.40771 |
| CLIP2       | CAP-Gly domain-containing linker protein 2                             | + | 3.60175 | 0.00659574 | -1.40392 |
| ATP6V1B2    | V-type proton ATPase subunit B, brain isoform                          | + | 1.76827 | 0.0328707  | -1.40232 |
| PSMB2       | Proteasome subunit beta type-2                                         | + | 2.08995 | 0.0176778  | -1.40169 |
| PSMC4       | 26S protease regulatory subunit 6B                                     | + | 2.74674 | 0.00849485 | -1.39784 |

|           |                                                                    |   |         |            |          |
|-----------|--------------------------------------------------------------------|---|---------|------------|----------|
| IKBKG     | NF-kappa-B essential modulator                                     | + | 2.89497 | 0.00769767 | -1.39029 |
| PIGK      | GPI-anchor transamidase                                            | + | 1.90702 | 0.0248351  | -1.38948 |
| SPATA5L1  | Spermatogenesis-associated protein 5-like protein 1                | + | 1.6755  | 0.0403884  | -1.38057 |
| RANBP1    | Ran-specific GTPase-activating protein                             | + | 2.80055 | 0.00855615 | -1.37636 |
| NCKAP1    | Nck-associated protein 1                                           | + | 2.11998 | 0.0175262  | -1.36804 |
| RUVBL1    | RuvB-like 1                                                        | + | 4.12588 | 0.00477193 | -1.36656 |
| COG1      | Conserved oligomeric Golgi complex subunit 1                       | + | 1.80359 | 0.0322342  | -1.36465 |
| ITGB1     | Integrin beta-1                                                    | + | 1.68652 | 0.0401002  | -1.3553  |
| PSMG1     | Proteasome assembly chaperone 1                                    | + | 1.87063 | 0.0269851  | -1.34572 |
| TXLNA     | Alpha-taxilin                                                      | + | 1.61125 | 0.0461532  | -1.34213 |
| SNX2      | Sorting nexin-2                                                    | + | 3.21089 | 0.00696296 | -1.34155 |
| ACAA1     | 3-ketoacyl-CoA thiolase, peroxisomal                               | + | 2.05077 | 0.0206588  | -1.33866 |
| ARHGAP4   | Rho GTPase-activating protein 4                                    | + | 1.89052 | 0.0266231  | -1.32906 |
| NUFIP2    | Nuclear fragile X mental retardation-interacting protein 2         | + | 1.76167 | 0.0343947  | -1.32318 |
| GRSF1     | G-rich sequence factor 1                                           | + | 1.68253 | 0.0408889  | -1.31439 |
| EEF1D     | Elongation factor 1-delta                                          | + | 2.32669 | 0.0137463  | -1.30776 |
| ZMPSTE24  | CAAX prenyl protease 1 homolog                                     | + | 2.72348 | 0.00898522 | -1.30513 |
| TBL2      | Transducin beta-like protein 2                                     | + | 2.20262 | 0.0162745  | -1.28975 |
| SUN2      | SUN domain-containing protein 2                                    | + | 3.19742 | 0.00762857 | -1.28712 |
| RRBP1     | Ribosome-binding protein 1                                         | + | 1.94146 | 0.024376   | -1.28466 |
| PDLIM5    | PDZ and LIM domain protein 5                                       | + | 1.70521 | 0.0400335  | -1.2815  |
| PDCD5     | Programmed cell death protein 5                                    | + | 2.18065 | 0.016962   | -1.27096 |
| TRAP1     | Heat shock protein 75 kDa, mitochondrial                           | + | 2.79104 | 0.00892929 | -1.27043 |
| ACSL3     | Long-chain-fatty-acid--CoA ligase 3                                | + | 1.93491 | 0.0249152  | -1.27042 |
| SNX5      | Sorting nexin-5                                                    | + | 2.83913 | 0.00867368 | -1.26844 |
| ACSL5     | Long-chain-fatty-acid--CoA ligase 5                                | + | 2.57038 | 0.0110364  | -1.2668  |
| CLNS1A    | Methylosome subunit pICln                                          | + | 2.01324 | 0.0229589  | -1.24137 |
| TRIM25    | E3 ubiquitin/ISG15 ligase TRIM25                                   | + | 2.3692  | 0.0136541  | -1.23552 |
| INPPL1    | Phosphatidylinositol 3,4,5-trisphosphate 5-phosphatase 2           | + | 2.11169 | 0.0193947  | -1.23517 |
| PDHA1     | Pyruvate dehydrogenase E1 component subunit alpha, somatic form, r | + | 2.66165 | 0.0107246  | -1.23303 |
| IMPDH2    | Inosine-5-monophosphate dehydrogenase 2                            | + | 1.75485 | 0.0371121  | -1.23053 |
| MYH14     | Myosin-14                                                          | + | 3.79781 | 0.00666667 | -1.2225  |
| RAB11FIP1 | Rab11 family-interacting protein 1                                 | + | 2.31968 | 0.0148986  | -1.22146 |

|             |                                                                  |   |         |            |          |
|-------------|------------------------------------------------------------------|---|---------|------------|----------|
| TMCO1       | Transmembrane and coiled-coil domain-containing protein 1        | + | 1.7884  | 0.034442   | -1.21978 |
| FAM98A      | Protein FAM98A                                                   | + | 1.75147 | 0.0382232  | -1.21823 |
| CAD         | CAD protein;Glutamine-dependent carbamoyl-phosphate synthase;Asp | + | 2.74466 | 0.00986275 | -1.20871 |
| FLNC        | Filamin-C                                                        | + | 3.02369 | 0.00774269 | -1.20754 |
| LARS        | Leucine--tRNA ligase, cytoplasmic                                | + | 2.937   | 0.00879121 | -1.20445 |
| PSMD2       | 26S proteasome non-ATPase regulatory subunit 2                   | + | 2.09218 | 0.0206512  | -1.20388 |
| VARS        | Valine--tRNA ligase                                              | + | 2.73927 | 0.0101268  | -1.20332 |
| WDR55       | WD repeat-containing protein 55                                  | + | 1.65495 | 0.0452698  | -1.20279 |
| SORD        | Sorbitol dehydrogenase                                           | + | 4.02391 | 0.00594737 | -1.19861 |
| EIF3E       | Eukaryotic translation initiation factor 3 subunit E             | + | 1.79745 | 0.0338462  | -1.19808 |
| MRPS23      | 28S ribosomal protein S23, mitochondrial                         | + | 2.25602 | 0.01628    | -1.19759 |
| AARS        | Alanine--tRNA ligase, cytoplasmic                                | + | 2.26271 | 0.0160269  | -1.19597 |
| SOAT1       | Sterol O-acyltransferase 1                                       | + | 2.67901 | 0.0108762  | -1.18116 |
| UQCRH       | Cytochrome b-c1 complex subunit 6, mitochondrial                 | + | 1.81893 | 0.0329067  | -1.1695  |
| PSMD3       | 26S proteasome non-ATPase regulatory subunit 3                   | + | 1.87218 | 0.031715   | -1.15855 |
| PSMC1       | 26S protease regulatory subunit 4                                | + | 2.07683 | 0.0216544  | -1.15543 |
| FLII        | Protein flightless-1 homolog                                     | + | 1.93463 | 0.0270524  | -1.15461 |
| TPD52L2     | Tumor protein D54                                                | + | 2.67076 | 0.0113991  | -1.15399 |
| PSME1       | Proteasome activator complex subunit 1                           | + | 1.99265 | 0.0245039  | -1.14519 |
| CCT8        | T-complex protein 1 subunit theta                                | + | 4.04882 | 0.00653165 | -1.14412 |
| WDR1        | WD repeat-containing protein 1                                   | + | 1.92607 | 0.0278227  | -1.14253 |
| MYL6        | Myosin light polypeptide 6                                       | + | 1.91249 | 0.0289395  | -1.13406 |
| SMN1;SMN2   | Survival motor neuron protein                                    | + | 1.75702 | 0.0392966  | -1.13215 |
| IPO5        | Importin-5                                                       | + | 2.281   | 0.0163279  | -1.12858 |
| EIF3H       | Eukaryotic translation initiation factor 3 subunit H             | + | 2.1263  | 0.0207114  | -1.12841 |
| ARHGEF1     | Rho guanine nucleotide exchange factor 1                         | + | 2.01554 | 0.0245147  | -1.12725 |
| ATXN2L      | Ataxin-2-like protein                                            | + | 1.71296 | 0.0434029  | -1.12534 |
| HLA-C       |                                                                  | + | 3.09914 | 0.00778824 | -1.12505 |
| SPAG9       | C-Jun-amino-terminal kinase-interacting protein 4                | + | 2.29706 | 0.0159197  | -1.1244  |
| RLTPR       | Leucine-rich repeat-containing protein 16C                       | + | 1.93923 | 0.0272277  | -1.12188 |
| EMD         | Emerin                                                           | + | 2.49534 | 0.0121868  | -1.1198  |
| RAB8A       | Ras-related protein Rab-8A                                       | + | 1.88676 | 0.0317905  | -1.11936 |
| ANXA2;ANXA2 | Annexin A2;Annexin;Putative annexin A2-like protein              | + | 3.32443 | 0.00741667 | -1.11346 |

|          |                                                                       |   |         |            |           |
|----------|-----------------------------------------------------------------------|---|---------|------------|-----------|
| IRS1     | Insulin receptor substrate 1                                          | + | 1.92719 | 0.0288467  | -1.11252  |
| CLTA     | Clathrin light chain A                                                | + | 1.68656 | 0.0449243  | -1.108    |
| MRPL15   | 39S ribosomal protein L15, mitochondrial                              | + | 3.05796 | 0.00793296 | -1.10781  |
| EPRS     | Bifunctional glutamate/proline--tRNA ligase;Glutamate--tRNA ligase;Pr | + | 2.12287 | 0.0209364  | -1.10501  |
| PSME2    | Proteasome activator complex subunit 2                                | + | 2.42341 | 0.0140741  | -1.09614  |
| ASNS     | Asparagine synthetase [glutamine-hydrolyzing]                         | + | 2.64264 | 0.0117205  | -1.09338  |
| CCT6A    | T-complex protein 1 subunit zeta                                      | + | 1.75534 | 0.0401667  | -1.09096  |
| MPP7     | MAGUK p55 subfamily member 7                                          | + | 1.69405 | 0.045104   | -1.08806  |
| HDLBP    | Vigilin                                                               | + | 2.67116 | 0.0116123  | -1.07583  |
| NSF      | Vesicle-fusing ATPase                                                 | + | 2.7086  | 0.0110868  | -1.06745  |
| AKAP12   | A-kinase anchor protein 12                                            | + | 2.70003 | 0.0115135  | -1.06176  |
| DNAJA2   | DnaJ homolog subfamily A member 2                                     | + | 1.86096 | 0.0330354  | -1.04921  |
| HSP90AB1 | Heat shock protein HSP 90-beta                                        | + | 4.13742 | 0.00615385 | -1.04669  |
| PSMB5    | Proteasome subunit beta type-5                                        | + | 2.35072 | 0.0160811  | -1.04211  |
| ATP5H    | ATP synthase subunit d, mitochondrial                                 | + | 1.7434  | 0.0434918  | -1.03928  |
| AMPD2    | AMP deaminase 2                                                       | + | 1.67241 | 0.0478677  | -1.0289   |
| PSME3    | Proteasome activator complex subunit 3                                | + | 2.17018 | 0.0210029  | -1.01425  |
| CRLF3    | Cytokine receptor-like factor 3                                       | + | 1.81055 | 0.0388365  | -1.01088  |
| RAP1GDS1 | Rap1 GTPase-GDP dissociation stimulator 1                             | + | 1.93556 | 0.0318663  | -1.00615  |
| MTHFD1L  | Monofunctional C1-tetrahydrofolate synthase, mitochondrial            | + | 2.44222 | 0.0156272  | -1.00002  |
| LIMD1    | LIM domain-containing protein 1                                       | + | 1.79591 | 0.0401176  | -0.998254 |
| DNAJA1   | DnaJ homolog subfamily A member 1                                     | + | 1.96719 | 0.0294231  | -0.986506 |
| EHBP1L1  | EH domain-binding protein 1-like protein 1                            | + | 1.83076 | 0.0385011  | -0.981099 |
| UBE4B    | Ubiquitin conjugation factor E4 B                                     | + | 1.76559 | 0.0435935  | -0.971836 |
| CCT5     | T-complex protein 1 subunit epsilon                                   | + | 2.62391 | 0.0122344  | -0.959883 |
| PPP2R1A  | Serine/threonine-protein phosphatase 2A 65 kDa regulatory subunit A   | + | 3.19401 | 0.00864865 | -0.946864 |
| MRPL18   | 39S ribosomal protein L18, mitochondrial                              | + | 2.18294 | 0.0217031  | -0.938083 |
| MARS     | Methionine--tRNA ligase, cytoplasmic                                  | + | 2.17323 | 0.0224847  | -0.937227 |
| PSMC5    | 26S protease regulatory subunit 8                                     | + | 2.40675 | 0.0162215  | -0.934537 |
| IQGAP1   | Ras GTPase-activating-like protein IQGAP1                             | + | 2.74422 | 0.0125188  | -0.93216  |
| ZC3HAV1  | Zinc finger CCCH-type antiviral protein 1                             | + | 2.03386 | 0.0284988  | -0.917403 |
| CTTN     | Src substrate cortactin                                               | + | 1.95137 | 0.0329471  | -0.911373 |
| SND1     | Staphylococcal nuclease domain-containing protein 1                   | + | 2.12511 | 0.0243158  | -0.903797 |

|          |                                                                                      |   |         |            |           |
|----------|--------------------------------------------------------------------------------------|---|---------|------------|-----------|
| ADAM15   | Disintegrin and metalloproteinase domain-containing protein 15                       | + | 2.09809 | 0.025374   | -0.90143  |
| KARS     | Lysine--tRNA ligase                                                                  | + | 2.39364 | 0.0172414  | -0.895737 |
| FLNA     |                                                                                      | + | 2.48306 | 0.0161356  | -0.882753 |
| DHX30    | Putative ATP-dependent RNA helicase DHX30                                            | + | 2.01178 | 0.0316398  | -0.874439 |
| P4HB     | Protein disulfide-isomerase                                                          | + | 2.11115 | 0.0259596  | -0.86462  |
| CTNNA1   | Catenin alpha-1                                                                      | + | 1.97135 | 0.0328288  | -0.86384  |
| ARHGEF2  | Rho guanine nucleotide exchange factor 2                                             | + | 2.749   | 0.0120927  | -0.846774 |
| UPF1     | Regulator of nonsense transcripts 1                                                  | + | 1.81078 | 0.0444008  | -0.84189  |
| TRIP10   | Cdc42-interacting protein 4                                                          | + | 2.4995  | 0.0162186  | -0.834333 |
| HSP90AA1 | Heat shock protein HSP 90-alpha                                                      | + | 2.78856 | 0.0123307  | -0.828227 |
| STT3B    | Dolichyl-diphosphooligosaccharide--protein glycosyltransferase subunit 3             | + | 2.05717 | 0.0314906  | -0.813467 |
| NEMF     | Nuclear export mediator factor NEMF                                                  | + | 1.81927 | 0.0456079  | -0.803697 |
| REEP3    | Receptor expression-enhancing protein 3                                              | + | 2.0303  | 0.0328716  | -0.800393 |
| TCP1     | T-complex protein 1 subunit alpha                                                    | + | 3.47122 | 0.00862827 | -0.778273 |
| PSMC3    | 26S protease regulatory subunit 6A                                                   | + | 1.96506 | 0.0390021  | -0.76195  |
| SH3KBP1  | SH3 domain-containing kinase-binding protein 1                                       | + | 1.81994 | 0.0478519  | -0.749034 |
| PDLIM1   | PDZ and LIM domain protein 1                                                         | + | 2.07832 | 0.0329112  | -0.743907 |
| CCT3     | T-complex protein 1 subunit gamma                                                    | + | 2.13233 | 0.031565   | -0.735797 |
| PSMA5    | Proteasome subunit alpha type-5                                                      | + | 2.0719  | 0.0329667  | -0.734027 |
| POLR2B   | DNA-directed RNA polymerase II subunit RPB2;DNA-directed RNA polymerase II subunit 2 | + | 4.13905 | 0.00725161 | -0.717764 |
| RUVBL2   | RuvB-like 2                                                                          | + | 1.93976 | 0.043839   | -0.690264 |
| PDIA6    | Protein disulfide-isomerase A6                                                       | + | 2.04256 | 0.038641   | -0.690016 |
| NMT1     | Glycylpeptide N-tetradecanoyltransferase 1                                           | + | 2.17904 | 0.0329374  | -0.67009  |
| ATP5O    | ATP synthase subunit O, mitochondrial                                                | + | 2.44563 | 0.0243125  | -0.629454 |
| TXNDC12  | Thioredoxin domain-containing protein 12                                             | + | 2.09639 | 0.0402021  | -0.624037 |
| HSPA5    | 78 kDa glucose-regulated protein                                                     | + | 2.50826 | 0.0278914  | -0.558083 |
| PSMC6    | 26S protease regulatory subunit 10B                                                  | + | 2.58952 | 0.0328036  | -0.480863 |
| DPYSL2   | Dihydropyrimidinase-related protein 2                                                | + | 2.68274 | 0.0321589  | -0.472036 |
| PRDX1    | Peroxiredoxin-1                                                                      | + | 2.29788 | 0.0491163  | -0.44853  |
